# Supplementary material for: TROAP Promotes Breast Cancer Proliferation and Metastasis
Source: Hindawi journal article supplement (doi:10.1155/2019/6140951), 2019-05-06
Supplement: f1 [file 6140951.f1.pdf]

Supplemental table 1. TROAP and its related positive genes in three GEO dataset

| Gene symbol | GSE42568 |           | GSE21653 |           | GSE1456 |           |
|-------------|----------|-----------|----------|-----------|---------|-----------|
|             | R-value  | P-value   | R-value  | P value   | R-value | P-value   |
| ACAD10      | 0.417    | 1.48E-06  | 0.32     | 6.60E-07  | 0.314   | 0.0026285 |
| ACTL6A      | 0.245    | 0.0085303 | 0.189    | 0.0046755 | 0.32    | 0.0021588 |
| ALG3        | 0.356    | 6.27E-05  | 0.349    | 4.67E-08  | 0.338   | 0.0010768 |
| AP1S1       | 0.257    | 0.0055639 | 0.34     | 1.06E-07  | 0.421   | 2.43E-05  |
| APOBEC3B    | 0.429    | 6.29E-07  | 0.395    | 3.78E-10  | 0.447   | 6.38E-06  |
| ARHGAP11A   | 0.283    | 0.0020076 | 0.521    | 3.98E-18  | 0.302   | 0.0041226 |
| ARHGEF1     | 0.285    | 0.0018276 | 0.217    | 0.0010013 | 0.281   | 0.0081263 |
| ARMC6       | 0.314    | 0.0005173 | 0.425    | 1.09E-11  | 0.408   | 4.73E-05  |
| ARPC5L      | 0.254    | 0.0061395 | 0.424    | 1.16E-11  | 0.395   | 9.09E-05  |
| ASF1B       | 0.748    | 4.96E-26  | 0.682    | 2.50E-35  | 0.632   | 1.05E-11  |
| ASNS        | 0.299    | 0.0010191 | 0.354    | 2.84E-08  | 0.306   | 0.0035679 |
| ASPM        | 0.551    | 9.99E-12  | 0.701    | 4.67E-38  | 0.59    | 6.08E-10  |
| ATAD2       | 0.442    | 2.32E-07  | 0.461    | 7.28E-14  | 0.414   | 3.67E-05  |
| ATAD3A      | 0.293    | 0.0013223 | 0.565    | 7.12E-22  | 0.485   | 6.95E-07  |
| ATAD5       | 0.413    | 1.85E-06  | 0.39     | 6.52E-10  | 0.394   | 9.58E-05  |
| ATAT1       | 0.28     | 0.0022399 | 0.38     | 1.87E-09  | 0.414   | 3.66E-05  |
| ATP13A1     | 0.311    | 0.0005846 | 0.197    | 0.003088  | 0.529   | 4.65E-08  |
| ATP2A2      | 0.324    | 0.0003163 | 0.396    | 3.32E-10  | 0.435   | 1.19E-05  |
| AUNIP       | 0.47     | 2.54E-08  | 0.639    | 1.23E-29  | 0.488   | 5.82E-07  |
| AURKA       | 0.65     | 3.01E-17  | 0.735    | 9.66E-44  | 0.625   | 2.45E-11  |
| AURKB       | 0.519    | 3.57E-10  | 0.727    | 3.02E-42  | 0.413   | 3.78E-05  |
| B4GALT2     | 0.287    | 0.00173   | 0.443    | 9.23E-13  | 0.3     | 0.0043254 |

|          |       |           |       |          |       |           |
|----------|-------|-----------|-------|----------|-------|-----------|
| BARD1    | 0.427 | 6.90E-07  | 0.349 | 4.48E-08 | 0.491 | 4.89E-07  |
| BIRC5    | 0.548 | 1.38E-11  | 0.721 | 2.97E-41 | 0.535 | 3.40E-08  |
| BLM      | 0.607 | 1.50E-14  | 0.765 | 3.54E-49 | 0.476 | 1.20E-06  |
| BORA     | 0.425 | 8.27E-07  | 0.397 | 3.05E-10 | 0.418 | 2.98E-05  |
| BRCA2    | 0.266 | 0.0039161 | 0.292 | 6.68E-06 | 0.429 | 1.64E-05  |
| BRIP1    | 0.254 | 0.0063101 | 0.606 | 6.56E-26 | 0.478 | 1.11E-06  |
| BRPF1    | 0.335 | 0.0001947 | 0.403 | 1.53E-10 | 0.299 | 0.0045133 |
| BUB1     | 0.366 | 3.51E-05  | 0.655 | 1.25E-31 | 0.509 | 1.74E-07  |
| BUB1B    | 0.564 | 2.64E-12  | 0.708 | 3.07E-39 | 0.53  | 4.57E-08  |
| BYSL     | 0.438 | 3.18E-07  | 0.393 | 4.56E-10 | 0.31  | 0.0030781 |
| C1orf106 | 0.271 | 0.0031809 | 0.423 | 1.38E-11 | 0.382 | 0.0001644 |
| C1orf35  | 0.343 | 0.0001266 | 0.457 | 1.26E-13 | 0.447 | 6.27E-06  |
| C6orf47  | 0.313 | 0.0005417 | 0.259 | 7.18E-05 | 0.368 | 0.0003134 |
| CARM1    | 0.259 | 0.0050719 | 0.394 | 3.97E-10 | 0.354 | 0.0005661 |
| CBS      | 0.28  | 0.0022909 | 0.389 | 7.19E-10 | 0.441 | 8.79E-06  |
| CCHCR1   | 0.319 | 0.0004131 | 0.474 | 1.10E-14 | 0.462 | 2.70E-06  |
| CCNA2    | 0.606 | 1.56E-14  | 0.627 | 3.43E-28 | 0.539 | 2.65E-08  |
| CCNB1    | 0.576 | 6.53E-13  | 0.602 | 1.90E-25 | 0.451 | 5.08E-06  |
| CCNB2    | 0.591 | 9.94E-14  | 0.72  | 4.20E-41 | 0.597 | 3.66E-10  |
| CCNE1    | 0.403 | 3.82E-06  | 0.625 | 4.99E-28 | 0.421 | 2.46E-05  |
| CCNE2    | 0.494 | 3.47E-09  | 0.491 | 7.13E-16 | 0.535 | 3.42E-08  |
| CCNF     | 0.36  | 4.96E-05  | 0.687 | 4.92E-36 | 0.521 | 8.37E-08  |
| CD3EAP   | 0.421 | 1.08E-06  | 0.429 | 5.94E-12 | 0.352 | 0.0006029 |
| CDC20    | 0.591 | 1.00E-13  | 0.748 | 4.44E-46 | 0.557 | 7.69E-09  |
| CDC25B   | 0.43  | 5.74E-07  | 0.527 | 1.50E-18 | 0.509 | 1.73E-07  |
| CDC25C   | 0.49  | 4.81E-09  | 0.754 | 3.91E-47 | 0.491 | 4.90E-07  |

|        |       |           |       |           |       |           |
|--------|-------|-----------|-------|-----------|-------|-----------|
| CDC6   | 0.568 | 1.65E-12  | 0.478 | 5.98E-15  | 0.382 | 0.0001645 |
| CDC7   | 0.393 | 7.02E-06  | 0.53  | 7.48E-19  | 0.402 | 6.47E-05  |
| CDCA3  | 0.485 | 7.24E-09  | 0.765 | 3.20E-49  | 0.636 | 9.20E-12  |
| CDCA4  | 0.442 | 2.37E-07  | 0.584 | 1.08E-23  | 0.505 | 2.32E-07  |
| CDCA8  | 0.559 | 4.47E-12  | 0.693 | 6.69E-37  | 0.497 | 3.49E-07  |
| CDK1   | 0.621 | 2.03E-15  | 0.633 | 6.21E-29  | 0.542 | 2.23E-08  |
| CDK2   | 0.404 | 3.51E-06  | 0.532 | 5.71E-19  | 0.295 | 0.005182  |
| CDKN3  | 0.675 | 4.78E-19  | 0.655 | 1.25E-31  | 0.452 | 4.79E-06  |
| CDT1   | 0.421 | 1.11E-06  | 0.731 | 6.09E-43  | 0.589 | 6.93E-10  |
| CELSR3 | 0.291 | 0.0014052 | 0.326 | 3.84E-07  | 0.419 | 2.82E-05  |
| CENPA  | 0.559 | 4.38E-12  | 0.642 | 4.57E-30  | 0.497 | 3.47E-07  |
| CENPE  | 0.555 | 6.82E-12  | 0.703 | 2.47E-38  | 0.361 | 0.000424  |
| CENPF  | 0.623 | 1.74E-15  | 0.742 | 7.09E-45  | 0.538 | 2.86E-08  |
| CENPM  | 0.464 | 4.04E-08  | 0.663 | 1.04E-32  | 0.544 | 2.00E-08  |
| CENPN  | 0.5   | 1.95E-09  | 0.611 | 1.83E-26  | 0.46  | 2.95E-06  |
| CEP250 | 0.474 | 1.77E-08  | 0.55  | 1.51E-20  | 0.327 | 0.0016372 |
| CEP55  | 0.578 | 5.22E-13  | 0.644 | 2.78E-30  | 0.542 | 2.20E-08  |
| CFL1   | 0.435 | 3.92E-07  | 0.229 | 0.0005147 | 0.566 | 3.85E-09  |
| CHAF1A | 0.522 | 2.57E-10  | 0.692 | 8.45E-37  | 0.357 | 0.0005061 |
| CHD7   | 0.246 | 0.008154  | 0.268 | 3.83E-05  | 0.404 | 5.88E-05  |
| CHEK1  | 0.514 | 5.54E-10  | 0.546 | 3.53E-20  | 0.514 | 1.27E-07  |
| CKAP5  | 0.329 | 0.000253  | 0.601 | 2.40E-25  | 0.303 | 0.0038945 |
| CKS2   | 0.474 | 1.87E-08  | 0.581 | 2.21E-23  | 0.547 | 1.55E-08  |
| CLCN2  | 0.319 | 0.0003985 | 0.373 | 4.13E-09  | 0.361 | 0.0004225 |
| CORT   | 0.27  | 0.0033531 | 0.499 | 1.92E-16  | 0.403 | 5.99E-05  |
| CPNE7  | 0.468 | 3.05E-08  | 0.244 | 0.0002019 | 0.384 | 0.0001456 |

|         |       |           |       |           |       |           |
|---------|-------|-----------|-------|-----------|-------|-----------|
| CSK     | 0.33  | 0.0002434 | 0.387 | 9.32E-10  | 0.363 | 0.000377  |
| CSTF2   | 0.375 | 2.13E-05  | 0.367 | 7.55E-09  | 0.415 | 3.45E-05  |
| CTPS1   | 0.405 | 3.28E-06  | 0.503 | 9.38E-17  | 0.394 | 9.43E-05  |
| CTRL    | 0.337 | 0.0001746 | 0.451 | 2.90E-13  | 0.39  | 0.0001138 |
| DBF4    | 0.397 | 5.38E-06  | 0.439 | 1.70E-12  | 0.424 | 2.16E-05  |
| DBNDD1  | 0.312 | 0.0005815 | 0.399 | 2.27E-10  | 0.38  | 0.0001825 |
| DDX11   | 0.256 | 0.0057084 | 0.611 | 1.76E-26  | 0.536 | 3.17E-08  |
| DDX39A  | 0.534 | 6.63E-11  | 0.636 | 2.64E-29  | 0.498 | 3.39E-07  |
| DDX56   | 0.356 | 5.97E-05  | 0.39  | 6.33E-10  | 0.327 | 0.0016481 |
| DEPDC1  | 0.45  | 1.26E-07  | 0.589 | 3.48E-24  | 0.599 | 3.41E-10  |
| DHX34   | 0.247 | 0.0079263 | 0.394 | 4.12E-10  | 0.396 | 8.74E-05  |
| DLGAP5  | 0.603 | 2.28E-14  | 0.652 | 2.81E-31  | 0.468 | 1.90E-06  |
| DNA2    | 0.417 | 1.43E-06  | 0.528 | 1.08E-18  | 0.357 | 0.0004927 |
| DNAJC9  | 0.459 | 6.19E-08  | 0.547 | 2.78E-20  | 0.477 | 1.19E-06  |
| DNMT1   | 0.381 | 1.47E-05  | 0.426 | 9.44E-12  | 0.517 | 1.04E-07  |
| DNMT3B  | 0.476 | 1.53E-08  | 0.543 | 6.65E-20  | 0.512 | 1.45E-07  |
| DONSON  | 0.479 | 1.16E-08  | 0.534 | 4.03E-19  | 0.344 | 0.0008384 |
| DPP3    | 0.289 | 0.0015501 | 0.238 | 0.0003015 | 0.419 | 2.85E-05  |
| DSCC1   | 0.412 | 2.07E-06  | 0.627 | 3.47E-28  | 0.415 | 3.45E-05  |
| DTL     | 0.587 | 1.67E-13  | 0.681 | 4.02E-35  | 0.603 | 2.69E-10  |
| DTYMK   | 0.52  | 3.15E-10  | 0.566 | 6.41E-22  | 0.371 | 0.000264  |
| DUS1L   | 0.272 | 0.0031308 | 0.396 | 3.18E-10  | 0.4   | 6.98E-05  |
| E2F1    | 0.496 | 2.81E-09  | 0.729 | 1.13E-42  | 0.52  | 8.45E-08  |
| E2F8    | 0.476 | 1.48E-08  | 0.627 | 3.17E-28  | 0.552 | 1.13E-08  |
| ECT2    | 0.39  | 8.78E-06  | 0.395 | 3.69E-10  | 0.445 | 7.00E-06  |
| EIF2AK1 | 0.325 | 0.0003011 | 0.281 | 1.48E-05  | 0.401 | 6.64E-05  |

|         |       |           |       |           |       |           |
|---------|-------|-----------|-------|-----------|-------|-----------|
| EMD     | 0.362 | 4.29E-05  | 0.291 | 6.85E-06  | 0.355 | 0.0005386 |
| EPHA1   | 0.267 | 0.00375   | 0.2   | 0.0025723 | 0.501 | 2.77E-07  |
| ERCC6L  | 0.373 | 2.35E-05  | 0.584 | 1.31E-23  | 0.482 | 8.58E-07  |
| ESPL1   | 0.583 | 2.98E-13  | 0.893 | 2.56E-89  | 0.667 | 3.19E-13  |
| ESRP1   | 0.372 | 2.47E-05  | 0.285 | 1.10E-05  | 0.509 | 1.73E-07  |
| ETV7    | 0.373 | 2.34E-05  | 0.404 | 1.40E-10  | 0.301 | 0.0042564 |
| EXO1    | 0.572 | 1.03E-12  | 0.693 | 7.60E-37  | 0.485 | 7.10E-07  |
| EXOSC4  | 0.302 | 0.0008882 | 0.304 | 2.62E-06  | 0.315 | 0.0025817 |
| EZH2    | 0.507 | 1.07E-09  | 0.742 | 6.92E-45  | 0.602 | 2.77E-10  |
| FA2H    | 0.283 | 0.0019903 | 0.196 | 0.0032083 | 0.351 | 0.0006359 |
| FAM64A  | 0.546 | 1.80E-11  | 0.703 | 2.01E-38  | 0.456 | 3.89E-06  |
| FANCC   | 0.302 | 0.0008945 | 0.5   | 1.54E-16  | 0.42  | 2.67E-05  |
| FANCG   | 0.248 | 0.0076855 | 0.572 | 1.74E-22  | 0.647 | 2.57E-12  |
| FANCI   | 0.503 | 1.57E-09  | 0.717 | 1.49E-40  | 0.503 | 2.58E-07  |
| FARSA   | 0.335 | 0.0001942 | 0.332 | 2.23E-07  | 0.421 | 2.43E-05  |
| FBRS    | 0.334 | 0.0001953 | 0.31  | 1.53E-06  | 0.328 | 0.0015863 |
| FBXL6   | 0.402 | 4.04E-06  | 0.479 | 4.62E-15  | 0.577 | 1.67E-09  |
| FBXO5   | 0.342 | 0.000134  | 0.391 | 5.72E-10  | 0.3   | 0.0043346 |
| FEN1    | 0.403 | 3.82E-06  | 0.661 | 2.29E-32  | 0.425 | 2.06E-05  |
| FER1L4  | 0.426 | 7.93E-07  | 0.371 | 4.99E-09  | 0.38  | 0.0001798 |
| FKBP4   | 0.296 | 0.0011482 | 0.241 | 0.000237  | 0.461 | 2.86E-06  |
| FOXM1   | 0.531 | 9.19E-11  | 0.791 | 9.38E-55  | 0.593 | 4.80E-10  |
| GAPDH   | 0.276 | 0.0026872 | 0.361 | 1.42E-08  | 0.334 | 0.001264  |
| GATAD2A | 0.266 | 0.0040033 | 0.372 | 4.68E-09  | 0.34  | 0.0009745 |
| GINS1   | 0.602 | 2.30E-14  | 0.694 | 4.84E-37  | 0.569 | 3.20E-09  |
| GINS2   | 0.406 | 2.95E-06  | 0.552 | 1.06E-20  | 0.598 | 3.61E-10  |

|         |       |           |       |           |       |           |
|---------|-------|-----------|-------|-----------|-------|-----------|
| GINS4   | 0.299 | 0.0010046 | 0.425 | 9.91E-12  | 0.388 | 0.0001232 |
| GMEB2   | 0.299 | 0.0010067 | 0.384 | 1.32E-09  | 0.467 | 2.13E-06  |
| GMNN    | 0.296 | 0.00116   | 0.374 | 3.67E-09  | 0.281 | 0.0082703 |
| GMPPA   | 0.371 | 2.55E-05  | 0.185 | 0.005722  | 0.321 | 0.0020713 |
| GMPS    | 0.318 | 0.00043   | 0.476 | 7.78E-15  | 0.385 | 0.0001448 |
| GPR19   | 0.379 | 1.65E-05  | 0.567 | 4.94E-22  | 0.36  | 0.0004331 |
| GPSM2   | 0.276 | 0.0027093 | 0.493 | 5.11E-16  | 0.332 | 0.0013317 |
| GRK6    | 0.292 | 0.0013462 | 0.421 | 1.76E-11  | 0.379 | 0.000189  |
| GRWD1   | 0.275 | 0.0027126 | 0.317 | 8.06E-07  | 0.401 | 6.81E-05  |
| GTPBP3  | 0.406 | 3.12E-06  | 0.195 | 0.0033836 | 0.293 | 0.005415  |
| H2AFX   | 0.581 | 3.74E-13  | 0.655 | 1.17E-31  | 0.457 | 3.66E-06  |
| HAMP    | 0.328 | 0.0002718 | 0.3   | 3.37E-06  | 0.3   | 0.0044097 |
| HAUS5   | 0.321 | 0.0003767 | 0.307 | 1.95E-06  | 0.511 | 1.49E-07  |
| HAUS7   | 0.331 | 0.0002375 | 0.398 | 2.83E-10  | 0.279 | 0.0087598 |
| HDGF    | 0.382 | 1.43E-05  | 0.555 | 5.78E-21  | 0.456 | 3.83E-06  |
| HELLS   | 0.324 | 0.0003145 | 0.443 | 9.26E-13  | 0.584 | 1.04E-09  |
| HGS     | 0.263 | 0.0045074 | 0.351 | 3.72E-08  | 0.445 | 6.98E-06  |
| HIP1R   | 0.264 | 0.0042805 | 0.316 | 9.10E-07  | 0.481 | 9.11E-07  |
| HJURP   | 0.6   | 2.96E-14  | 0.773 | 7.75E-51  | 0.497 | 3.57E-07  |
| HMGA1   | 0.412 | 2.01E-06  | 0.409 | 7.59E-11  | 0.503 | 2.49E-07  |
| HMGB2   | 0.476 | 1.55E-08  | 0.549 | 1.83E-20  | 0.35  | 0.000651  |
| HMGB3   | 0.392 | 7.63E-06  | 0.514 | 1.50E-17  | 0.498 | 3.39E-07  |
| HMGB3P1 | 0.39  | 8.32E-06  | 0.454 | 2.02E-13  | 0.393 | 0.0001006 |
| HMMR    | 0.47  | 2.49E-08  | 0.589 | 4.16E-24  | 0.636 | 8.45E-12  |
| HN1     | 0.48  | 1.11E-08  | 0.536 | 2.61E-19  | 0.353 | 0.000595  |
| HNRNPAB | 0.287 | 0.0017163 | 0.399 | 2.51E-10  | 0.279 | 0.0087528 |

|          |       |           |       |           |       |           |
|----------|-------|-----------|-------|-----------|-------|-----------|
| HOXC11   | 0.265 | 0.0040575 | 0.244 | 0.0002059 | 0.458 | 3.34E-06  |
| HPCAL1   | 0.273 | 0.0029498 | 0.351 | 3.75E-08  | 0.37  | 0.0002853 |
| HSPBP1   | 0.333 | 0.0002047 | 0.346 | 6.29E-08  | 0.5   | 3.09E-07  |
| IGHMBP2  | 0.344 | 0.0001209 | 0.353 | 3.05E-08  | 0.305 | 0.0036536 |
| IKBKE    | 0.332 | 0.0002193 | 0.261 | 6.30E-05  | 0.376 | 0.0002172 |
| IMPDH1   | 0.372 | 2.47E-05  | 0.421 | 1.61E-11  | 0.421 | 2.43E-05  |
| IPO13    | 0.291 | 0.001412  | 0.368 | 6.58E-09  | 0.431 | 1.50E-05  |
| IPO4     | 0.26  | 0.0048879 | 0.351 | 3.82E-08  | 0.527 | 5.69E-08  |
| ISG15    | 0.242 | 0.0093914 | 0.238 | 0.0002938 | 0.324 | 0.0018638 |
| JARID2   | 0.252 | 0.0066992 | 0.3   | 3.41E-06  | 0.562 | 5.45E-09  |
| KCTD5    | 0.353 | 7.24E-05  | 0.233 | 0.0004003 | 0.32  | 0.0021414 |
| KIAA0101 | 0.544 | 2.28E-11  | 0.613 | 1.31E-26  | 0.597 | 3.61E-10  |
| KIF11    | 0.516 | 4.43E-10  | 0.605 | 9.21E-26  | 0.569 | 3.15E-09  |
| KIF14    | 0.547 | 1.66E-11  | 0.69  | 1.96E-36  | 0.422 | 2.35E-05  |
| KIF15    | 0.463 | 4.47E-08  | 0.723 | 1.07E-41  | 0.56  | 6.21E-09  |
| KIF18A   | 0.44  | 2.74E-07  | 0.554 | 7.95E-21  | 0.357 | 0.0005016 |
| KIF18B   | 0.557 | 5.59E-12  | 0.808 | 9.13E-59  | 0.689 | 2.15E-14  |
| KIF20A   | 0.481 | 1.07E-08  | 0.76  | 2.37E-48  | 0.594 | 4.79E-10  |
| KIF20B   | 0.257 | 0.005485  | 0.553 | 9.88E-21  | 0.303 | 0.0038656 |
| KIF22    | 0.435 | 4.00E-07  | 0.518 | 7.26E-18  | 0.394 | 9.50E-05  |
| KIF23    | 0.387 | 1.04E-05  | 0.626 | 4.09E-28  | 0.613 | 9.10E-11  |
| KIF2C    | 0.639 | 1.39E-16  | 0.749 | 3.67E-46  | 0.611 | 1.04E-10  |
| KIF4A    | 0.612 | 7.14E-15  | 0.742 | 7.31E-45  | 0.564 | 4.43E-09  |
| KIFC1    | 0.621 | 2.05E-15  | 0.763 | 8.36E-49  | 0.618 | 5.01E-11  |
| KLHDC4   | 0.335 | 0.0001912 | 0.427 | 7.74E-12  | 0.363 | 0.0003766 |
| KPNA2    | 0.411 | 2.12E-06  | 0.61  | 2.71E-26  | 0.414 | 3.66E-05  |

|            |       |           |       |           |       |           |
|------------|-------|-----------|-------|-----------|-------|-----------|
| LAD1       | 0.284 | 0.0019677 | 0.442 | 1.15E-12  | 0.401 | 6.85E-05  |
| LAGE3      | 0.457 | 7.50E-08  | 0.358 | 1.84E-08  | 0.306 | 0.0035627 |
| LHX2       | 0.28  | 0.0023027 | 0.385 | 1.16E-09  | 0.344 | 0.0008422 |
| LIG1       | 0.472 | 2.27E-08  | 0.574 | 1.14E-22  | 0.453 | 4.56E-06  |
| LLGL2      | 0.326 | 0.0002965 | 0.232 | 0.0004126 | 0.471 | 1.68E-06  |
| LMNB1      | 0.503 | 1.56E-09  | 0.617 | 4.81E-27  | 0.517 | 1.03E-07  |
| LMNB2      | 0.393 | 7.09E-06  | 0.532 | 5.32E-19  | 0.394 | 9.38E-05  |
| LOC730101  | 0.36  | 5.00E-05  | 0.222 | 0.0007881 | 0.309 | 0.0032216 |
| LRFN4      | 0.258 | 0.0054253 | 0.407 | 9.25E-11  | 0.316 | 0.0024821 |
| LRP8       | 0.468 | 3.01E-08  | 0.452 | 2.73E-13  | 0.391 | 0.0001064 |
| LRRC14     | 0.264 | 0.0043539 | 0.251 | 0.0001272 | 0.276 | 0.0096453 |
| LSM4       | 0.405 | 3.24E-06  | 0.399 | 2.26E-10  | 0.315 | 0.0025744 |
| LSR        | 0.269 | 0.0035414 | 0.294 | 5.41E-06  | 0.435 | 1.19E-05  |
| LYPLA2     | 0.277 | 0.0025985 | 0.29  | 7.37E-06  | 0.423 | 2.26E-05  |
| MAD2L1     | 0.536 | 5.55E-11  | 0.403 | 1.44E-10  | 0.368 | 0.0003035 |
| MAP1S      | 0.319 | 0.0003998 | 0.271 | 3.19E-05  | 0.317 | 0.0023948 |
| MARCKSL1   | 0.312 | 0.0005837 | 0.185 | 0.0055489 | 0.493 | 4.40E-07  |
| MAZ        | 0.275 | 0.0028042 | 0.284 | 1.23E-05  | 0.502 | 2.76E-07  |
| MC1R       | 0.32  | 0.0003918 | 0.37  | 5.69E-09  | 0.381 | 0.000174  |
| MCM10      | 0.496 | 2.84E-09  | 0.628 | 2.55E-28  | 0.284 | 0.0074221 |
| MCM2       | 0.573 | 1.02E-12  | 0.573 | 1.26E-22  | 0.519 | 9.15E-08  |
| MCM3       | 0.367 | 3.24E-05  | 0.503 | 1.00E-16  | 0.364 | 0.0003669 |
| MCM3AP-AS1 | 0.281 | 0.0021649 | 0.262 | 5.89E-05  | 0.357 | 0.0004926 |
| MCM4       | 0.307 | 0.0007052 | 0.582 | 1.90E-23  | 0.53  | 4.53E-08  |
| MCM5       | 0.482 | 9.73E-09  | 0.472 | 1.49E-14  | 0.343 | 0.0008676 |
| MCM6       | 0.467 | 3.18E-08  | 0.516 | 1.09E-17  | 0.327 | 0.0016558 |



|        |       |           |       |           |       |           |
|--------|-------|-----------|-------|-----------|-------|-----------|
| MCM7   | 0.341 | 0.0001404 | 0.572 | 1.77E-22  | 0.465 | 2.38E-06  |
| MELK   | 0.548 | 1.40E-11  | 0.709 | 2.20E-39  | 0.461 | 2.88E-06  |
| MEN1   | 0.304 | 0.0008127 | 0.22  | 0.000863  | 0.403 | 5.97E-05  |
| METTL1 | 0.283 | 0.0019801 | 0.38  | 1.97E-09  | 0.465 | 2.35E-06  |
| MIS18A | 0.439 | 3.03E-07  | 0.48  | 4.19E-15  | 0.337 | 0.00112   |
| MKI67  | 0.485 | 7.56E-09  | 0.734 | 1.63E-43  | 0.597 | 3.62E-10  |
| MKRN3  | 0.282 | 0.0021394 | 0.232 | 0.0004358 | 0.306 | 0.0035738 |
| MMP1   | 0.272 | 0.0031089 | 0.376 | 2.90E-09  | 0.395 | 8.96E-05  |
| MRGBP  | 0.452 | 1.14E-07  | 0.59  | 2.91E-24  | 0.449 | 5.76E-06  |
| MTHFD2 | 0.371 | 2.51E-05  | 0.306 | 2.21E-06  | 0.513 | 1.41E-07  |
| MUTYH  | 0.347 | 0.0001043 | 0.536 | 2.62E-19  | 0.331 | 0.0014005 |
| MYBL1  | 0.372 | 2.48E-05  | 0.395 | 3.73E-10  | 0.316 | 0.0024628 |
| MYBL2  | 0.566 | 2.05E-12  | 0.775 | 3.37E-51  | 0.462 | 2.77E-06  |
| MYO19  | 0.268 | 0.0036918 | 0.429 | 5.92E-12  | 0.56  | 6.23E-09  |
| MYO9B  | 0.308 | 0.0006716 | 0.291 | 6.87E-06  | 0.318 | 0.0022595 |
| NAT10  | 0.272 | 0.0031162 | 0.426 | 9.15E-12  | 0.459 | 3.26E-06  |
| NCAPD2 | 0.38  | 1.53E-05  | 0.484 | 2.16E-15  | 0.364 | 0.000362  |
| NCAPG  | 0.481 | 1.01E-08  | 0.754 | 3.75E-47  | 0.579 | 1.50E-09  |
| NCAPG2 | 0.325 | 0.0003109 | 0.598 | 4.66E-25  | 0.486 | 6.40E-07  |
| NCAPH  | 0.522 | 2.54E-10  | 0.725 | 6.22E-42  | 0.501 | 2.78E-07  |
| NDC80  | 0.453 | 1.00E-07  | 0.663 | 1.18E-32  | 0.548 | 1.44E-08  |
| NEIL3  | 0.486 | 6.63E-09  | 0.663 | 1.28E-32  | 0.648 | 2.49E-12  |
| NEK2   | 0.592 | 9.63E-14  | 0.642 | 5.31E-30  | 0.519 | 9.12E-08  |
| NEU3   | 0.294 | 0.0012886 | 0.185 | 0.0056313 | 0.374 | 0.0002391 |
| NOP16  | 0.243 | 0.0092231 | 0.357 | 2.04E-08  | 0.398 | 7.96E-05  |
| NOP2   | 0.36  | 4.96E-05  | 0.585 | 1.05E-23  | 0.496 | 3.78E-07  |

|          |       |           |       |           |       |           |
|----------|-------|-----------|-------|-----------|-------|-----------|
| NPEPL1   | 0.317 | 0.0004425 | 0.24  | 0.0002646 | 0.306 | 0.0035972 |
| NPM3     | 0.269 | 0.0034632 | 0.378 | 2.49E-09  | 0.279 | 0.0086516 |
| NUP205   | 0.3   | 0.0009874 | 0.407 | 9.55E-11  | 0.302 | 0.0040223 |
| NUP85    | 0.396 | 5.96E-06  | 0.483 | 2.86E-15  | 0.278 | 0.0089556 |
| NUSAP1   | 0.647 | 4.20E-17  | 0.738 | 2.75E-44  | 0.636 | 7.92E-12  |
| OIP5     | 0.615 | 4.36E-15  | 0.563 | 1.14E-21  | 0.432 | 1.37E-05  |
| ORC6     | 0.421 | 1.12E-06  | 0.697 | 1.80E-37  | 0.566 | 3.87E-09  |
| OTUB1    | 0.322 | 0.0003576 | 0.346 | 5.84E-08  | 0.493 | 4.35E-07  |
| PA2G4    | 0.415 | 1.65E-06  | 0.525 | 2.09E-18  | 0.453 | 4.48E-06  |
| PAFAH1B3 | 0.293 | 0.0013228 | 0.231 | 0.0004546 | 0.403 | 5.97E-05  |
| PAICS    | 0.335 | 0.0001907 | 0.327 | 3.54E-07  | 0.44  | 9.20E-06  |
| PARPBP   | 0.329 | 0.0002566 | 0.477 | 7.21E-15  | 0.372 | 0.0002609 |
| PASK     | 0.378 | 1.72E-05  | 0.458 | 1.23E-13  | 0.516 | 1.12E-07  |
| PBK      | 0.556 | 5.78E-12  | 0.59  | 2.96E-24  | 0.598 | 3.48E-10  |
| PCNA     | 0.386 | 1.07E-05  | 0.439 | 1.61E-12  | 0.39  | 0.000112  |
| PDCD11   | 0.242 | 0.0094209 | 0.367 | 7.30E-09  | 0.505 | 2.28E-07  |
| PDIA4    | 0.256 | 0.0058602 | 0.175 | 0.0088668 | 0.384 | 0.0001481 |
| PDSS1    | 0.428 | 6.65E-07  | 0.465 | 4.40E-14  | 0.42  | 2.60E-05  |
| PFKL     | 0.268 | 0.0037009 | 0.29  | 7.63E-06  | 0.276 | 0.0095797 |
| PITX1    | 0.243 | 0.0090162 | 0.229 | 0.0005134 | 0.393 | 0.0001001 |
| PKMYT1   | 0.533 | 7.34E-11  | 0.773 | 7.01E-51  | 0.438 | 9.99E-06  |
| PLOD3    | 0.279 | 0.0024072 | 0.371 | 5.29E-09  | 0.379 | 0.0001858 |
| POLA2    | 0.293 | 0.0013229 | 0.592 | 1.93E-24  | 0.299 | 0.0045287 |
| POLD1    | 0.372 | 2.49E-05  | 0.56  | 2.34E-21  | 0.388 | 0.0001267 |
| POLE2    | 0.468 | 3.05E-08  | 0.471 | 1.59E-14  | 0.435 | 1.19E-05  |
| POLQ     | 0.471 | 2.42E-08  | 0.762 | 8.45E-49  | 0.434 | 1.26E-05  |

|          |       |           |       |           |       |           |
|----------|-------|-----------|-------|-----------|-------|-----------|
| POLR1C   | 0.357 | 5.76E-05  | 0.47  | 1.91E-14  | 0.535 | 3.47E-08  |
| POLR2H   | 0.359 | 5.27E-05  | 0.346 | 5.94E-08  | 0.544 | 1.92E-08  |
| POP1     | 0.296 | 0.0011489 | 0.389 | 7.17E-10  | 0.36  | 0.000441  |
| PPAT     | 0.314 | 0.000516  | 0.347 | 5.61E-08  | 0.494 | 4.13E-07  |
| PPFIA3   | 0.298 | 0.0010524 | 0.321 | 5.98E-07  | 0.398 | 7.93E-05  |
| PPME1    | 0.291 | 0.0014358 | 0.341 | 9.91E-08  | 0.353 | 0.000583  |
| PPP1R10  | 0.273 | 0.0030171 | 0.253 | 0.0001119 | 0.459 | 3.22E-06  |
| PPP1R14B | 0.389 | 9.05E-06  | 0.397 | 2.88E-10  | 0.332 | 0.0013752 |
| PPP2R5D  | 0.303 | 0.0008661 | 0.415 | 3.39E-11  | 0.296 | 0.0050326 |
| PPP6R1   | 0.289 | 0.0015355 | 0.315 | 9.94E-07  | 0.353 | 0.0005832 |
| PRAME    | 0.459 | 6.32E-08  | 0.271 | 3.16E-05  | 0.277 | 0.0092106 |
| PRC1     | 0.559 | 4.55E-12  | 0.763 | 6.33E-49  | 0.532 | 4.12E-08  |
| PRKCSH   | 0.274 | 0.0029176 | 0.382 | 1.59E-09  | 0.433 | 1.33E-05  |
| PSRC1    | 0.498 | 2.36E-09  | 0.612 | 1.57E-26  | 0.593 | 5.02E-10  |
| PTBP1    | 0.316 | 0.0004612 | 0.426 | 8.53E-12  | 0.459 | 3.17E-06  |
| PTMA     | 0.378 | 1.73E-05  | 0.29  | 7.34E-06  | 0.376 | 0.0002171 |
| PTTG1    | 0.659 | 7.83E-18  | 0.756 | 1.73E-47  | 0.592 | 5.29E-10  |
| PTTG3P   | 0.487 | 6.62E-09  | 0.709 | 2.99E-39  | 0.411 | 4.16E-05  |
| PVR      | 0.449 | 1.36E-07  | 0.377 | 2.78E-09  | 0.283 | 0.0075617 |
| PYCR1    | 0.39  | 8.36E-06  | 0.307 | 1.91E-06  | 0.478 | 1.09E-06  |
| PYCRL    | 0.334 | 0.0001951 | 0.187 | 0.0051155 | 0.371 | 0.0002671 |
| RABIF    | 0.401 | 4.22E-06  | 0.303 | 2.82E-06  | 0.364 | 0.0003723 |
| RACGAP1  | 0.554 | 7.89E-12  | 0.638 | 1.66E-29  | 0.574 | 2.11E-09  |
| RAD51    | 0.435 | 3.97E-07  | 0.652 | 3.01E-31  | 0.531 | 4.39E-08  |
| RAD51AP1 | 0.479 | 1.16E-08  | 0.587 | 5.75E-24  | 0.452 | 4.64E-06  |
| RAD54L   | 0.38  | 1.55E-05  | 0.796 | 6.71E-56  | 0.514 | 1.28E-07  |

|          |       |           |       |           |       |           |
|----------|-------|-----------|-------|-----------|-------|-----------|
| RAE1     | 0.289 | 0.001536  | 0.435 | 2.69E-12  | 0.396 | 8.42E-05  |
| RALY     | 0.494 | 3.42E-09  | 0.342 | 8.93E-08  | 0.455 | 4.06E-06  |
| RAPGEFL1 | 0.292 | 0.0014042 | 0.273 | 2.79E-05  | 0.281 | 0.0080592 |
| RASGRF1  | 0.4   | 4.38E-06  | 0.219 | 0.0009216 | 0.297 | 0.0048852 |
| RBM14    | 0.281 | 0.0022181 | 0.423 | 1.37E-11  | 0.327 | 0.0016284 |
| RBM38    | 0.47  | 2.61E-08  | 0.403 | 1.46E-10  | 0.374 | 0.0002387 |
| RCC1     | 0.381 | 1.49E-05  | 0.343 | 7.89E-08  | 0.422 | 2.35E-05  |
| RECQL4   | 0.404 | 3.40E-06  | 0.703 | 2.10E-38  | 0.554 | 9.79E-09  |
| RECQL5   | 0.267 | 0.0038108 | 0.299 | 3.83E-06  | 0.279 | 0.0087761 |
| RFC3     | 0.426 | 7.67E-07  | 0.306 | 2.20E-06  | 0.34  | 0.00099   |
| RFC4     | 0.385 | 1.17E-05  | 0.559 | 2.59E-21  | 0.459 | 3.19E-06  |
| RGS19    | 0.351 | 7.90E-05  | 0.286 | 1.01E-05  | 0.284 | 0.0073094 |
| RHBDF2   | 0.293 | 0.0013313 | 0.369 | 6.16E-09  | 0.439 | 9.69E-06  |
| RIBC2    | 0.292 | 0.001348  | 0.437 | 2.18E-12  | 0.471 | 1.63E-06  |
| RMI1     | 0.476 | 1.57E-08  | 0.227 | 0.0005674 | 0.364 | 0.0003693 |
| RNASEH2A | 0.565 | 2.28E-12  | 0.563 | 1.10E-21  | 0.371 | 0.0002633 |
| RPP38    | 0.381 | 1.48E-05  | 0.303 | 2.77E-06  | 0.293 | 0.0054137 |
| RPS6KB2  | 0.373 | 2.33E-05  | 0.452 | 2.58E-13  | 0.432 | 1.43E-05  |
| RRM2     | 0.586 | 1.82E-13  | 0.607 | 5.90E-26  | 0.542 | 2.25E-08  |
| RUVBL2   | 0.293 | 0.0013004 | 0.424 | 1.15E-11  | 0.282 | 0.0078498 |
| SAC3D1   | 0.47  | 2.56E-08  | 0.492 | 6.24E-16  | 0.435 | 1.20E-05  |
| SCRIB    | 0.273 | 0.0029351 | 0.361 | 1.41E-08  | 0.471 | 1.63E-06  |
| SDHAF1   | 0.325 | 0.0003115 | 0.205 | 0.0019635 | 0.287 | 0.0068011 |
| SF3A2    | 0.305 | 0.0007956 | 0.314 | 1.13E-06  | 0.325 | 0.0017744 |
| SF3B4    | 0.384 | 1.26E-05  | 0.402 | 1.76E-10  | 0.491 | 4.94E-07  |
| SH2B2    | 0.293 | 0.0013319 | 0.291 | 7.26E-06  | 0.493 | 4.43E-07  |

|         |       |           |       |           |       |           |
|---------|-------|-----------|-------|-----------|-------|-----------|
| SHCBP1  | 0.429 | 6.00E-07  | 0.51  | 2.74E-17  | 0.377 | 0.0002016 |
| SHMT2   | 0.335 | 0.0001891 | 0.504 | 8.22E-17  | 0.355 | 0.0005478 |
| SIRT7   | 0.299 | 0.00102   | 0.357 | 2.02E-08  | 0.364 | 0.0003724 |
| SKIV2L  | 0.253 | 0.0064903 | 0.281 | 1.56E-05  | 0.348 | 0.000704  |
| SLC12A9 | 0.277 | 0.0025295 | 0.279 | 1.75E-05  | 0.438 | 1.01E-05  |
| SLC17A9 | 0.31  | 0.0006196 | 0.245 | 0.0001882 | 0.339 | 0.0010365 |
| SLC29A2 | 0.304 | 0.0008066 | 0.277 | 2.05E-05  | 0.298 | 0.0045764 |
| SLC2A1  | 0.394 | 6.74E-06  | 0.373 | 4.25E-09  | 0.423 | 2.31E-05  |
| SLC35A2 | 0.362 | 4.28E-05  | 0.291 | 6.96E-06  | 0.427 | 1.78E-05  |
| SLC38A7 | 0.373 | 2.35E-05  | 0.346 | 5.89E-08  | 0.39  | 0.0001141 |
| SLC39A4 | 0.321 | 0.0003725 | 0.381 | 1.66E-09  | 0.497 | 3.46E-07  |
| SLC52A2 | 0.509 | 8.80E-10  | 0.433 | 3.58E-12  | 0.434 | 1.25E-05  |
| SLC7A5  | 0.426 | 7.63E-07  | 0.593 | 1.66E-24  | 0.523 | 7.21E-08  |
| SMARCA4 | 0.245 | 0.0085744 | 0.363 | 1.12E-08  | 0.531 | 4.23E-08  |
| SMC4    | 0.387 | 1.03E-05  | 0.381 | 1.82E-09  | 0.445 | 7.00E-06  |
| SND1    | 0.353 | 7.26E-05  | 0.195 | 0.0033319 | 0.344 | 0.0008391 |
| SNRPB   | 0.371 | 2.60E-05  | 0.276 | 2.27E-05  | 0.33  | 0.0014386 |
| SNRPF   | 0.407 | 2.87E-06  | 0.419 | 2.29E-11  | 0.334 | 0.0012664 |
| SPAG5   | 0.557 | 5.60E-12  | 0.702 | 3.25E-38  | 0.58  | 1.44E-09  |
| SPC25   | 0.513 | 5.73E-10  | 0.526 | 1.63E-18  | 0.473 | 1.49E-06  |
| SQLE    | 0.425 | 8.15E-07  | 0.244 | 0.0001942 | 0.458 | 3.30E-06  |
| STIL    | 0.382 | 1.41E-05  | 0.595 | 1.05E-24  | 0.519 | 9.36E-08  |
| STMN1   | 0.493 | 3.66E-09  | 0.577 | 6.37E-23  | 0.39  | 0.0001132 |
| STX3    | 0.271 | 0.003262  | 0.217 | 0.0010309 | 0.418 | 2.88E-05  |
| SUGP2   | 0.244 | 0.008901  | 0.196 | 0.0032123 | 0.521 | 8.28E-08  |
| SUPT5H  | 0.353 | 7.28E-05  | 0.277 | 2.02E-05  | 0.362 | 0.0004013 |

|          |       |           |       |           |       |           |
|----------|-------|-----------|-------|-----------|-------|-----------|
| SUV39H1  | 0.395 | 6.37E-06  | 0.644 | 2.91E-30  | 0.453 | 4.37E-06  |
| TACC3    | 0.5   | 2.06E-09  | 0.791 | 1.06E-54  | 0.438 | 9.96E-06  |
| TAF6     | 0.261 | 0.0047178 | 0.272 | 2.89E-05  | 0.342 | 0.0009046 |
| TATDN2   | 0.284 | 0.0019226 | 0.284 | 1.23E-05  | 0.31  | 0.0030139 |
| TCOF1    | 0.305 | 0.0007854 | 0.507 | 5.25E-17  | 0.311 | 0.0029771 |
| TD02     | 0.36  | 4.88E-05  | 0.197 | 0.0030742 | 0.33  | 0.0014357 |
| TDP1     | 0.346 | 0.0001081 | 0.326 | 3.98E-07  | 0.371 | 0.0002667 |
| TEX10    | 0.248 | 0.0077359 | 0.341 | 9.73E-08  | 0.42  | 2.58E-05  |
| TGIF2    | 0.421 | 1.12E-06  | 0.345 | 6.80E-08  | 0.466 | 2.24E-06  |
| THOP1    | 0.257 | 0.0054975 | 0.377 | 2.56E-09  | 0.464 | 2.43E-06  |
| TIMELESS | 0.627 | 9.96E-16  | 0.692 | 9.86E-37  | 0.485 | 7.21E-07  |
| TK1      | 0.568 | 1.62E-12  | 0.618 | 3.45E-27  | 0.406 | 5.37E-05  |
| TMC6     | 0.264 | 0.0043228 | 0.219 | 0.000906  | 0.285 | 0.0071968 |
| TMEM132A | 0.244 | 0.0086699 | 0.443 | 1.00E-12  | 0.524 | 7.06E-08  |
| TMEM74B  | 0.258 | 0.0052912 | 0.22  | 0.0008715 | 0.335 | 0.0012204 |
| TMEM97   | 0.456 | 7.86E-08  | 0.328 | 3.26E-07  | 0.492 | 4.79E-07  |
| TMPO     | 0.485 | 7.57E-09  | 0.361 | 1.36E-08  | 0.322 | 0.0020023 |
| TOMM34   | 0.368 | 3.05E-05  | 0.275 | 2.31E-05  | 0.494 | 4.13E-07  |
| TOMM40   | 0.564 | 2.62E-12  | 0.534 | 4.07E-19  | 0.527 | 5.64E-08  |
| TOP2A    | 0.506 | 1.12E-09  | 0.591 | 2.58E-24  | 0.572 | 2.56E-09  |
| TPI1     | 0.361 | 4.60E-05  | 0.503 | 9.84E-17  | 0.36  | 0.0004409 |
| TPX2     | 0.652 | 2.29E-17  | 0.711 | 1.41E-39  | 0.585 | 9.63E-10  |
| TRAPPC10 | 0.309 | 0.0006603 | 0.189 | 0.0047024 | 0.407 | 4.98E-05  |
| TRIM24   | 0.247 | 0.0079596 | 0.236 | 0.0003305 | 0.387 | 0.0001312 |
| TRIM26   | 0.266 | 0.0039405 | 0.317 | 8.01E-07  | 0.38  | 0.0001795 |
| TRIM28   | 0.283 | 0.0020019 | 0.239 | 0.000281  | 0.362 | 0.000409  |

|         |       |           |       |           |       |           |
|---------|-------|-----------|-------|-----------|-------|-----------|
| TRIP13  | 0.603 | 2.16E-14  | 0.666 | 5.35E-33  | 0.482 | 8.51E-07  |
| TROAP   | 1     | 0         | 1     | 0         | 1     | 0         |
| TRPM2   | 0.329 | 0.0002579 | 0.294 | 5.41E-06  | 0.285 | 0.0072731 |
| TSC22D4 | 0.32  | 0.000393  | 0.33  | 2.65E-07  | 0.389 | 0.0001199 |
| TTK     | 0.489 | 5.48E-09  | 0.708 | 3.39E-39  | 0.51  | 1.66E-07  |
| TTLL4   | 0.245 | 0.0084741 | 0.344 | 7.01E-08  | 0.33  | 0.0014674 |
| TUBA1B  | 0.449 | 1.34E-07  | 0.427 | 7.46E-12  | 0.282 | 0.0079241 |
| TUBA1C  | 0.407 | 2.78E-06  | 0.37  | 5.30E-09  | 0.286 | 0.0068128 |
| TYMS    | 0.553 | 7.94E-12  | 0.602 | 1.98E-25  | 0.469 | 1.80E-06  |
| U2AF2   | 0.25  | 0.0071707 | 0.371 | 5.14E-09  | 0.482 | 8.73E-07  |
| UBE2C   | 0.69  | 2.94E-20  | 0.801 | 4.20E-57  | 0.656 | 9.58E-13  |
| UBE2S   | 0.507 | 1.05E-09  | 0.574 | 1.13E-22  | 0.388 | 0.0001216 |
| UBQLN4  | 0.338 | 0.0001629 | 0.532 | 5.78E-19  | 0.309 | 0.0031701 |
| ULBP1   | 0.291 | 0.001418  | 0.205 | 0.0020047 | 0.323 | 0.0019324 |
| VAR5    | 0.317 | 0.0004408 | 0.391 | 5.69E-10  | 0.36  | 0.0004416 |
| WDR4    | 0.337 | 0.0001744 | 0.344 | 7.26E-08  | 0.422 | 2.37E-05  |
| WDR62   | 0.277 | 0.0025314 | 0.729 | 1.47E-42  | 0.408 | 4.85E-05  |
| WDR76   | 0.358 | 5.60E-05  | 0.344 | 7.39E-08  | 0.289 | 0.0062411 |
| WHSC1   | 0.326 | 0.0002978 | 0.54  | 1.16E-19  | 0.538 | 2.85E-08  |
| XPO6    | 0.3   | 0.0009834 | 0.316 | 9.36E-07  | 0.432 | 1.42E-05  |
| YIF1B   | 0.287 | 0.0017117 | 0.294 | 5.79E-06  | 0.325 | 0.0017547 |
| ZMIZ2   | 0.246 | 0.0082259 | 0.295 | 5.00E-06  | 0.467 | 2.03E-06  |
| ZMYM3   | 0.246 | 0.0083212 | 0.174 | 0.0093631 | 0.392 | 0.0001035 |
| ZNF335  | 0.262 | 0.0047014 | 0.242 | 0.000227  | 0.456 | 3.80E-06  |
| ZNF672  | 0.351 | 7.91E-05  | 0.266 | 4.55E-05  | 0.368 | 0.0003042 |
| ZWINT   | 0.639 | 1.49E-16  | 0.681 | 3.99E-35  | 0.569 | 3.17E-09  |

Supplemental table 2. TROAP and its related negative genes in three GEO dataset

| No. | Gene<br>symbol | GSE21653 |          | GSE1456 |          | GSE42568 |          |
|-----|----------------|----------|----------|---------|----------|----------|----------|
|     |                | R-value  | P-value  | R-value | P value  | R-value  | P-value  |
|     | PTPRM          | -0.34    | 1.06E-07 | -0.445  | 7.01E-06 | -0.399   | 4.82E-06 |
|     | ABCA6          | -0.552   | 1.02E-20 | -0.5    | 3.05E-07 | -0.319   | 0.000412 |
|     | ABCA8          | -0.532   | 5.71E-19 | -0.487  | 6.11E-07 | -0.323   | 0.000337 |
|     | ABLM1          | -0.185   | 0.005552 | -0.291  | 0.00598  | -0.357   | 5.82E-05 |
|     | ACVR1          | -0.405   | 1.14E-10 | -0.403  | 5.99E-05 | -0.507   | 1.06E-09 |
|     | ADAMTS5        | -0.311   | 1.44E-06 | -0.466  | 2.21E-06 | -0.312   | 0.000573 |
|     | ADD3           | -0.302   | 3.02E-06 | -0.359  | 0.000448 | -0.311   | 0.000607 |
|     | ADRA2A         | -0.511   | 2.29E-17 | -0.428  | 1.76E-05 | -0.392   | 7.35E-06 |
|     | AFF1           | -0.368   | 6.77E-09 | -0.398  | 7.81E-05 | -0.513   | 6.09E-10 |
|     | AHNAK          | -0.478   | 5.63E-15 | -0.388  | 0.000126 | -0.514   | 5.36E-10 |
|     | AKAP11         | -0.457   | 1.25E-13 | -0.495  | 3.93E-07 | -0.356   | 6.07E-05 |
|     | AKAP12         | -0.515   | 1.31E-17 | -0.572  | 2.64E-09 | -0.368   | 3.09E-05 |
|     | ALDH1A1        | -0.47    | 1.89E-14 | -0.495  | 4.12E-07 | -0.327   | 0.000276 |
|     | ALDH1A2        | -0.407   | 9.86E-11 | -0.372  | 0.000258 | -0.306   | 0.000764 |
|     | AMOTL2         | -0.293   | 6.03E-06 | -0.4    | 6.98E-05 | -0.326   | 0.000296 |
|     | ANGPTL2        | -0.31    | 1.56E-06 | -0.491  | 4.80E-07 | -0.393   | 6.85E-06 |
|     | ANK2           | -0.456   | 1.50E-13 | -0.487  | 6.23E-07 | -0.34    | 0.000148 |
|     | ANKMY2         | -0.324   | 4.36E-07 | -0.408  | 4.72E-05 | -0.346   | 0.000108 |
|     | ANXA6          | -0.273   | 2.66E-05 | -0.307  | 0.003426 | -0.255   | 0.005964 |
|     | AOC3           | -0.338   | 1.33E-07 | -0.523  | 7.08E-08 | -0.257   | 0.005483 |
|     | AOX1           | -0.243   | 0.000214 | -0.508  | 1.84E-07 | -0.256   | 0.005796 |
|     | APC            | -0.294   | 5.64E-06 | -0.448  | 5.80E-06 | -0.487   | 6.32E-09 |
|     | APPL2          | -0.516   | 9.54E-18 | -0.293  | 0.00551  | -0.362   | 4.28E-05 |



|          |        |          |        |          |        |          |
|----------|--------|----------|--------|----------|--------|----------|
| AQP1     | -0.376 | 2.80E-09 | -0.374 | 0.000232 | -0.249 | 0.007328 |
| ARHGAP6  | -0.444 | 7.75E-13 | -0.282 | 0.007926 | -0.356 | 6.17E-05 |
| ARHGEF40 | -0.349 | 4.45E-08 | -0.365 | 0.000357 | -0.284 | 0.001946 |
| ARID5B   | -0.35  | 4.16E-08 | -0.384 | 0.000145 | -0.336 | 0.000176 |
| ARL6IP5  | -0.35  | 4.20E-08 | -0.365 | 0.000351 | -0.483 | 9.03E-09 |
| ARMCX1   | -0.381 | 1.72E-09 | -0.346 | 0.000773 | -0.382 | 1.42E-05 |
| ASPH     | -0.215 | 0.001148 | -0.366 | 0.00034  | -0.352 | 7.60E-05 |
| ATG14    | -0.25  | 0.000133 | -0.283 | 0.007736 | -0.339 | 0.000154 |
| ATRX     | -0.29  | 7.59E-06 | -0.296 | 0.004923 | -0.321 | 0.000371 |
| AXL      | -0.396 | 3.44E-10 | -0.359 | 0.000461 | -0.389 | 9.19E-06 |
| BCL2L2   | -0.263 | 5.55E-05 | -0.363 | 0.000386 | -0.326 | 0.000295 |
| BCL6     | -0.191 | 0.00411  | -0.319 | 0.002166 | -0.309 | 0.000659 |
| BDH2     | -0.231 | 0.000461 | -0.35  | 0.000662 | -0.45  | 1.27E-07 |
| BHLHE41  | -0.441 | 1.22E-12 | -0.283 | 0.00765  | -0.284 | 0.001906 |
| BHMT2    | -0.399 | 2.27E-10 | -0.478 | 1.10E-06 | -0.34  | 0.000148 |
| BICC1    | -0.359 | 1.63E-08 | -0.427 | 1.84E-05 | -0.513 | 5.76E-10 |
| BNIP3L   | -0.425 | 1.02E-11 | -0.529 | 4.71E-08 | -0.302 | 0.000908 |
| BTD      | -0.372 | 4.54E-09 | -0.375 | 0.00022  | -0.275 | 0.002738 |
| C1R      | -0.326 | 3.96E-07 | -0.31  | 0.003058 | -0.464 | 4.11E-08 |
| C1S      | -0.295 | 5.22E-06 | -0.319 | 0.00219  | -0.4   | 4.35E-06 |
| C3       | -0.363 | 1.17E-08 | -0.297 | 0.004757 | -0.342 | 0.000134 |
| C7       | -0.476 | 8.40E-15 | -0.32  | 0.00215  | -0.258 | 0.005415 |
| CALD1    | -0.348 | 4.79E-08 | -0.326 | 0.001731 | -0.432 | 4.82E-07 |
| CAST     | -0.302 | 2.98E-06 | -0.507 | 2.02E-07 | -0.421 | 1.08E-06 |
| CAT      | -0.265 | 4.80E-05 | -0.549 | 1.36E-08 | -0.3   | 0.000979 |
| CAV1     | -0.451 | 3.23E-13 | -0.541 | 2.40E-08 | -0.496 | 2.68E-09 |

---

|         |        |          |        |          |        |          |
|---------|--------|----------|--------|----------|--------|----------|
| CAV2    | -0.313 | 1.21E-06 | -0.517 | 1.06E-07 | -0.386 | 1.11E-05 |
| CCND2   | -0.267 | 4.21E-05 | -0.321 | 0.002073 | -0.367 | 3.28E-05 |
| CD248   | -0.267 | 4.26E-05 | -0.373 | 0.000248 | -0.357 | 5.75E-05 |
| CD93    | -0.403 | 1.49E-10 | -0.293 | 0.005502 | -0.373 | 2.35E-05 |
| CD99    | -0.185 | 0.005534 | -0.317 | 0.002377 | -0.326 | 0.000299 |
| CDH5    | -0.412 | 5.16E-11 | -0.303 | 0.003884 | -0.302 | 0.000904 |
| CD01    | -0.375 | 3.37E-09 | -0.544 | 1.95E-08 | -0.273 | 0.002962 |
| CFH     | -0.417 | 2.80E-11 | -0.483 | 7.85E-07 | -0.474 | 1.83E-08 |
| CHRD1   | -0.401 | 1.82E-10 | -0.522 | 7.64E-08 | -0.255 | 0.005965 |
| CILP    | -0.439 | 1.55E-12 | -0.323 | 0.001931 | -0.453 | 1.02E-07 |
| CLDN5   | -0.336 | 1.54E-07 | -0.355 | 0.000536 | -0.328 | 0.000273 |
| CLIC2   | -0.295 | 5.10E-06 | -0.356 | 0.000524 | -0.277 | 0.002514 |
| CLN5    | -0.349 | 4.46E-08 | -0.357 | 0.000507 | -0.293 | 0.001323 |
| COL14A1 | -0.547 | 2.84E-20 | -0.329 | 0.001544 | -0.454 | 9.03E-08 |
| COL15A1 | -0.348 | 5.02E-08 | -0.301 | 0.004164 | -0.297 | 0.00112  |
| COL8A1  | -0.282 | 1.36E-05 | -0.284 | 0.007351 | -0.277 | 0.002573 |
| COLEC12 | -0.363 | 1.11E-08 | -0.28  | 0.008354 | -0.379 | 1.68E-05 |
| COPS4   | -0.222 | 0.000777 | -0.452 | 4.83E-06 | -0.326 | 0.00029  |
| COPZ2   | -0.323 | 4.90E-07 | -0.466 | 2.16E-06 | -0.478 | 1.23E-08 |
| COR02B  | -0.334 | 1.86E-07 | -0.378 | 0.000198 | -0.272 | 0.003151 |
| COX7A1  | -0.279 | 1.74E-05 | -0.493 | 4.36E-07 | -0.396 | 5.69E-06 |
| CPA3    | -0.45  | 3.63E-13 | -0.359 | 0.000462 | -0.364 | 3.86E-05 |
| CPE     | -0.497 | 2.56E-16 | -0.44  | 9.27E-06 | -0.288 | 0.001649 |
| CREBL2  | -0.474 | 1.12E-14 | -0.509 | 1.73E-07 | -0.328 | 0.000271 |
| CRIM1   | -0.472 | 1.55E-14 | -0.384 | 0.000146 | -0.342 | 0.000135 |
| CRK     | -0.27  | 3.38E-05 | -0.478 | 1.06E-06 | -0.289 | 0.001597 |

---

|            |        |          |        |          |        |          |
|------------|--------|----------|--------|----------|--------|----------|
| CSDE1      | -0.259 | 7.14E-05 | -0.462 | 2.66E-06 | -0.281 | 0.002165 |
| CSGALNACT1 | -0.228 | 0.000552 | -0.343 | 0.000867 | -0.335 | 0.000192 |
| CTSG       | -0.309 | 1.60E-06 | -0.309 | 0.003195 | -0.284 | 0.001977 |
| CTS0       | -0.541 | 1.03E-19 | -0.305 | 0.003671 | -0.336 | 0.000181 |
| CXCL12     | -0.574 | 9.84E-23 | -0.497 | 3.46E-07 | -0.483 | 9.01E-09 |
| CYBRD1     | -0.665 | 5.48E-33 | -0.492 | 4.64E-07 | -0.416 | 1.57E-06 |
| CYR61      | -0.359 | 1.75E-08 | -0.283 | 0.007588 | -0.418 | 1.40E-06 |
| DAAM2      | -0.239 | 0.000277 | -0.33  | 0.001448 | -0.249 | 0.007467 |
| DAB2       | -0.374 | 3.49E-09 | -0.515 | 1.23E-07 | -0.275 | 0.002787 |
| DCN        | -0.552 | 9.89E-21 | -0.43  | 1.52E-05 | -0.489 | 5.15E-09 |
| DDR2       | -0.328 | 3.27E-07 | -0.546 | 1.69E-08 | -0.404 | 3.45E-06 |
| DDX3X      | -0.237 | 0.00032  | -0.39  | 0.000113 | -0.379 | 1.68E-05 |
| DENND5B    | -0.223 | 0.000739 | -0.372 | 0.000252 | -0.254 | 0.006138 |
| DIXDC1     | -0.642 | 4.66E-30 | -0.5   | 2.98E-07 | -0.478 | 1.34E-08 |
| DLC1       | -0.398 | 2.65E-10 | -0.411 | 4.03E-05 | -0.399 | 4.65E-06 |
| DMXL1      | -0.345 | 6.42E-08 | -0.339 | 0.001024 | -0.3   | 0.000984 |
| DNAJB4     | -0.224 | 0.000699 | -0.488 | 5.89E-07 | -0.285 | 0.001896 |
| DOCK4      | -0.36  | 1.56E-08 | -0.286 | 0.007004 | -0.258 | 0.00542  |
| DPP4       | -0.203 | 0.002231 | -0.354 | 0.000573 | -0.321 | 0.000371 |
| DPT        | -0.423 | 1.32E-11 | -0.549 | 1.39E-08 | -0.455 | 8.91E-08 |
| DPYD       | -0.439 | 1.62E-12 | -0.43  | 1.51E-05 | -0.442 | 2.37E-07 |
| DPYSL2     | -0.315 | 9.60E-07 | -0.422 | 2.33E-05 | -0.446 | 1.68E-07 |
| DSE        | -0.278 | 1.87E-05 | -0.436 | 1.12E-05 | -0.426 | 7.71E-07 |
| DUSP1      | -0.481 | 3.59E-15 | -0.409 | 4.44E-05 | -0.319 | 0.000411 |
| DYNC1I2    | -0.231 | 0.000455 | -0.312 | 0.002846 | -0.327 | 0.000285 |
| EBF2       | -0.303 | 2.69E-06 | -0.418 | 2.93E-05 | -0.245 | 0.008618 |

|         |        |          |        |          |        |          |
|---------|--------|----------|--------|----------|--------|----------|
| ECM2    | -0.515 | 1.21E-17 | -0.559 | 6.78E-09 | -0.501 | 1.78E-09 |
| EFCAB14 | -0.478 | 6.07E-15 | -0.406 | 5.27E-05 | -0.438 | 3.19E-07 |
| EFEMP1  | -0.392 | 5.22E-10 | -0.428 | 1.73E-05 | -0.277 | 0.002564 |
| EFEMP2  | -0.248 | 0.000158 | -0.28  | 0.008515 | -0.443 | 2.25E-07 |
| EGR1    | -0.352 | 3.29E-08 | -0.412 | 3.91E-05 | -0.362 | 4.28E-05 |
| EHD2    | -0.305 | 2.34E-06 | -0.351 | 0.00063  | -0.555 | 6.38E-12 |
| EID1    | -0.445 | 7.21E-13 | -0.445 | 7.05E-06 | -0.336 | 0.000183 |
| EIF1B   | -0.309 | 1.65E-06 | -0.406 | 5.37E-05 | -0.455 | 8.55E-08 |
| ELK3    | -0.476 | 7.94E-15 | -0.38  | 0.000184 | -0.446 | 1.80E-07 |
| EMCN    | -0.536 | 2.38E-19 | -0.314 | 0.002659 | -0.302 | 0.000901 |
| EML1    | -0.283 | 1.31E-05 | -0.326 | 0.001697 | -0.414 | 1.77E-06 |
| EMP1    | -0.42  | 1.82E-11 | -0.428 | 1.70E-05 | -0.454 | 9.67E-08 |
| EMX2    | -0.185 | 0.005465 | -0.348 | 0.000706 | -0.451 | 1.17E-07 |
| ENPP2   | -0.303 | 2.68E-06 | -0.427 | 1.83E-05 | -0.323 | 0.000344 |
| EOGT    | -0.194 | 0.003516 | -0.291 | 0.005879 | -0.299 | 0.001004 |
| EPAS1   | -0.332 | 2.19E-07 | -0.523 | 7.22E-08 | -0.352 | 7.67E-05 |
| EPS15   | -0.271 | 3.19E-05 | -0.374 | 0.000235 | -0.296 | 0.00116  |
| ETFDH   | -0.278 | 1.90E-05 | -0.503 | 2.58E-07 | -0.27  | 0.003401 |
| EVI5    | -0.368 | 6.71E-09 | -0.337 | 0.00111  | -0.326 | 0.000289 |
| EZH1    | -0.278 | 1.94E-05 | -0.345 | 0.000828 | -0.483 | 8.50E-09 |
| F13A1   | -0.39  | 6.37E-10 | -0.505 | 2.30E-07 | -0.31  | 0.000637 |
| F3      | -0.356 | 2.19E-08 | -0.443 | 7.72E-06 | -0.301 | 0.000926 |
| F8      | -0.384 | 1.21E-09 | -0.46  | 2.97E-06 | -0.262 | 0.004703 |
| FAM172A | -0.496 | 3.23E-16 | -0.434 | 1.26E-05 | -0.345 | 0.000112 |
| FAM8A1  | -0.218 | 0.000983 | -0.333 | 0.001288 | -0.367 | 3.38E-05 |
| FAT4    | -0.486 | 1.67E-15 | -0.387 | 0.000129 | -0.415 | 1.65E-06 |

---

|           |        |          |        |          |        |          |
|-----------|--------|----------|--------|----------|--------|----------|
| FBLN1     | -0.477 | 7.26E-15 | -0.466 | 2.21E-06 | -0.523 | 2.47E-10 |
| FBLN2     | -0.29  | 7.76E-06 | -0.414 | 3.65E-05 | -0.354 | 7.03E-05 |
| FBLN5     | -0.305 | 2.24E-06 | -0.376 | 0.000211 | -0.334 | 0.000202 |
| FBN1      | -0.403 | 1.49E-10 | -0.439 | 9.95E-06 | -0.48  | 1.13E-08 |
| FBXL5     | -0.555 | 6.18E-21 | -0.533 | 4.08E-08 | -0.438 | 3.21E-07 |
| FBXO3     | -0.414 | 4.20E-11 | -0.406 | 5.31E-05 | -0.347 | 0.0001   |
| FCER1A    | -0.406 | 1.10E-10 | -0.404 | 5.88E-05 | -0.286 | 0.001764 |
| FERMT2    | -0.297 | 4.26E-06 | -0.539 | 2.64E-08 | -0.444 | 1.96E-07 |
| FGF1      | -0.337 | 1.35E-07 | -0.345 | 0.000805 | -0.389 | 8.83E-06 |
| FHL1      | -0.473 | 1.25E-14 | -0.55  | 1.30E-08 | -0.387 | 1.02E-05 |
| FILIP1L   | -0.307 | 1.96E-06 | -0.345 | 0.00082  | -0.409 | 2.50E-06 |
| FMOD      | -0.512 | 2.20E-17 | -0.453 | 4.38E-06 | -0.312 | 0.000583 |
| FNDC3A    | -0.47  | 1.98E-14 | -0.444 | 7.56E-06 | -0.428 | 6.41E-07 |
| FOS       | -0.493 | 5.78E-16 | -0.412 | 4.03E-05 | -0.318 | 0.000419 |
| FOSB      | -0.381 | 1.72E-09 | -0.293 | 0.005488 | -0.277 | 0.002583 |
| FOXO1     | -0.474 | 1.03E-14 | -0.408 | 4.84E-05 | -0.357 | 5.85E-05 |
| FSTL1     | -0.356 | 2.24E-08 | -0.416 | 3.29E-05 | -0.493 | 3.75E-09 |
| FXYD1     | -0.469 | 2.34E-14 | -0.393 | 9.87E-05 | -0.268 | 0.003582 |
| FYCO1     | -0.444 | 8.41E-13 | -0.332 | 0.001366 | -0.503 | 1.58E-09 |
| GABARAPL2 | -0.196 | 0.003199 | -0.352 | 0.000612 | -0.265 | 0.004186 |
| GAS1      | -0.36  | 1.55E-08 | -0.379 | 0.000186 | -0.421 | 1.12E-06 |
| GAS7      | -0.391 | 5.67E-10 | -0.371 | 0.000274 | -0.35  | 8.43E-05 |
| GCC2      | -0.407 | 9.81E-11 | -0.305 | 0.003605 | -0.283 | 0.001998 |
| GEM       | -0.432 | 4.12E-12 | -0.292 | 0.005708 | -0.361 | 4.65E-05 |
| GHR       | -0.3   | 3.56E-06 | -0.512 | 1.48E-07 | -0.306 | 0.000764 |
| GJA1      | -0.442 | 1.05E-12 | -0.286 | 0.006937 | -0.304 | 0.000825 |

---

|          |        |          |        |          |        |          |
|----------|--------|----------|--------|----------|--------|----------|
| GLT8D2   | -0.448 | 4.46E-13 | -0.283 | 0.007662 | -0.481 | 9.91E-09 |
| GNAL     | -0.246 | 0.000172 | -0.445 | 7.10E-06 | -0.256 | 0.005782 |
| GNG11    | -0.38  | 1.88E-09 | -0.565 | 4.44E-09 | -0.483 | 8.85E-09 |
| GNG12    | -0.558 | 3.25E-21 | -0.353 | 0.000596 | -0.515 | 5.16E-10 |
| GOLIM4   | -0.282 | 1.38E-05 | -0.3   | 0.004335 | -0.276 | 0.002664 |
| GPRASP1  | -0.422 | 1.57E-11 | -0.34  | 0.000984 | -0.272 | 0.003135 |
| GPX3     | -0.194 | 0.003491 | -0.473 | 1.48E-06 | -0.251 | 0.00685  |
| GRK5     | -0.221 | 0.000818 | -0.376 | 0.000218 | -0.26  | 0.004999 |
| GSN      | -0.34  | 1.08E-07 | -0.535 | 3.52E-08 | -0.375 | 2.04E-05 |
| GULP1    | -0.288 | 8.98E-06 | -0.421 | 2.54E-05 | -0.313 | 0.000542 |
| HNMT     | -0.524 | 2.58E-18 | -0.509 | 1.76E-07 | -0.468 | 3.09E-08 |
| HNRNPA0  | -0.353 | 2.95E-08 | -0.283 | 0.00771  | -0.367 | 3.36E-05 |
| HOXA5    | -0.333 | 2.07E-07 | -0.299 | 0.004514 | -0.252 | 0.006638 |
| HOXA7    | -0.265 | 4.69E-05 | -0.389 | 0.000118 | -0.346 | 0.000107 |
| HSD17B11 | -0.426 | 8.98E-12 | -0.533 | 4.03E-08 | -0.326 | 0.000289 |
| HSD17B4  | -0.193 | 0.003724 | -0.331 | 0.001386 | -0.379 | 1.66E-05 |
| HTR2B    | -0.411 | 6.02E-11 | -0.356 | 0.00051  | -0.264 | 0.004321 |
| HTRA1    | -0.461 | 7.81E-14 | -0.387 | 0.000127 | -0.507 | 1.07E-09 |
| ID1      | -0.335 | 1.73E-07 | -0.308 | 0.003351 | -0.301 | 0.000916 |
| ID3      | -0.248 | 0.000156 | -0.289 | 0.006321 | -0.359 | 5.07E-05 |
| IGBP1    | -0.341 | 9.95E-08 | -0.29  | 0.006117 | -0.261 | 0.00483  |
| IGF1     | -0.583 | 1.43E-23 | -0.52  | 8.92E-08 | -0.448 | 1.45E-07 |
| IGFBP6   | -0.447 | 5.77E-13 | -0.553 | 1.04E-08 | -0.422 | 1.06E-06 |
| IL1R1    | -0.395 | 3.84E-10 | -0.315 | 0.002591 | -0.379 | 1.67E-05 |
| IL6ST    | -0.575 | 8.07E-23 | -0.277 | 0.009261 | -0.318 | 0.000421 |
| ILK      | -0.217 | 0.001014 | -0.287 | 0.006728 | -0.321 | 0.000364 |

|          |        |          |        |          |        |          |
|----------|--------|----------|--------|----------|--------|----------|
| IRS2     | -0.285 | 1.10E-05 | -0.441 | 8.64E-06 | -0.378 | 1.77E-05 |
| ITGA7    | -0.208 | 0.001651 | -0.459 | 3.15E-06 | -0.335 | 0.000193 |
| ITGAV    | -0.374 | 3.65E-09 | -0.313 | 0.002722 | -0.447 | 1.62E-07 |
| ITIH5    | -0.42  | 1.88E-11 | -0.487 | 6.13E-07 | -0.314 | 0.000524 |
| ITM2A    | -0.396 | 3.41E-10 | -0.41  | 4.31E-05 | -0.262 | 0.00467  |
| ITSN1    | -0.239 | 0.00027  | -0.512 | 1.46E-07 | -0.381 | 1.50E-05 |
| JAK1     | -0.194 | 0.003534 | -0.424 | 2.08E-05 | -0.518 | 3.74E-10 |
| JAM2     | -0.475 | 9.18E-15 | -0.355 | 0.000548 | -0.297 | 0.001094 |
| JUN      | -0.246 | 0.000173 | -0.31  | 0.003059 | -0.258 | 0.005371 |
| KANK2    | -0.362 | 1.30E-08 | -0.431 | 1.49E-05 | -0.432 | 5.01E-07 |
| KCTD12   | -0.524 | 2.30E-18 | -0.506 | 2.11E-07 | -0.432 | 4.82E-07 |
| KIAA1109 | -0.343 | 7.66E-08 | -0.373 | 0.00024  | -0.358 | 5.44E-05 |
| KLF10    | -0.26  | 6.78E-05 | -0.343 | 0.000891 | -0.34  | 0.000147 |
| KLF2     | -0.414 | 4.28E-11 | -0.35  | 0.000662 | -0.333 | 0.000212 |
| KLF4     | -0.318 | 7.59E-07 | -0.522 | 7.77E-08 | -0.272 | 0.003109 |
| KLHL2    | -0.296 | 4.80E-06 | -0.379 | 0.000193 | -0.316 | 0.00048  |
| LAMA2    | -0.575 | 9.08E-23 | -0.443 | 7.97E-06 | -0.419 | 1.27E-06 |
| LAMA4    | -0.275 | 2.29E-05 | -0.499 | 3.12E-07 | -0.391 | 7.92E-06 |
| LAMC1    | -0.233 | 0.000396 | -0.4   | 6.96E-05 | -0.446 | 1.80E-07 |
| LAPTM4A  | -0.283 | 1.26E-05 | -0.337 | 0.001096 | -0.338 | 0.000163 |
| LDB2     | -0.51  | 3.06E-17 | -0.48  | 9.59E-07 | -0.444 | 1.99E-07 |
| LGALS3   | -0.177 | 0.00825  | -0.41  | 4.31E-05 | -0.288 | 0.001667 |
| LHFP     | -0.549 | 1.86E-20 | -0.469 | 1.89E-06 | -0.433 | 4.41E-07 |
| LIMA1    | -0.498 | 2.44E-16 | -0.422 | 2.41E-05 | -0.398 | 5.19E-06 |
| LIMCH1   | -0.352 | 3.30E-08 | -0.297 | 0.004881 | -0.365 | 3.70E-05 |
| LIPT1    | -0.232 | 0.000432 | -0.38  | 0.00018  | -0.288 | 0.001666 |

---

|        |        |          |        |          |        |          |
|--------|--------|----------|--------|----------|--------|----------|
| LMBRD1 | -0.375 | 3.18E-09 | -0.454 | 4.20E-06 | -0.384 | 1.26E-05 |
| LMOD1  | -0.416 | 3.31E-11 | -0.322 | 0.001987 | -0.483 | 8.55E-09 |
| LOX    | -0.289 | 8.31E-06 | -0.285 | 0.007159 | -0.447 | 1.62E-07 |
| LPAR1  | -0.487 | 1.44E-15 | -0.364 | 0.000372 | -0.481 | 9.90E-09 |
| LPAR6  | -0.441 | 1.25E-12 | -0.359 | 0.000456 | -0.41  | 2.35E-06 |
| LPL    | -0.305 | 2.30E-06 | -0.471 | 1.66E-06 | -0.25  | 0.007111 |
| LPP    | -0.331 | 2.39E-07 | -0.348 | 0.000714 | -0.261 | 0.004726 |
| LRP1   | -0.363 | 1.17E-08 | -0.355 | 0.000529 | -0.505 | 1.30E-09 |
| LUM    | -0.433 | 3.87E-12 | -0.277 | 0.009387 | -0.33  | 0.000242 |
| MAF    | -0.393 | 4.44E-10 | -0.505 | 2.28E-07 | -0.541 | 2.91E-11 |
| MAFB   | -0.385 | 1.10E-09 | -0.289 | 0.00628  | -0.267 | 0.003793 |
| MAGEH1 | -0.269 | 3.60E-05 | -0.288 | 0.006538 | -0.29  | 0.001518 |
| MAN1A1 | -0.417 | 2.78E-11 | -0.476 | 1.22E-06 | -0.415 | 1.65E-06 |
| MAN1A2 | -0.229 | 0.000522 | -0.397 | 8.28E-05 | -0.294 | 0.001275 |
| MAP1B  | -0.213 | 0.001258 | -0.325 | 0.001743 | -0.384 | 1.23E-05 |
| MAP9   | -0.328 | 3.34E-07 | -0.277 | 0.009282 | -0.25  | 0.007045 |
| MAT2B  | -0.256 | 9.26E-05 | -0.333 | 0.001288 | -0.295 | 0.001234 |
| MBNL2  | -0.26  | 7.10E-05 | -0.409 | 4.54E-05 | -0.376 | 2.04E-05 |
| MCFD2  | -0.266 | 4.67E-05 | -0.445 | 6.83E-06 | -0.273 | 0.003031 |
| MDFIC  | -0.226 | 0.000596 | -0.532 | 4.15E-08 | -0.291 | 0.001464 |
| MED4   | -0.338 | 1.23E-07 | -0.292 | 0.005591 | -0.267 | 0.00376  |
| MEIS2  | -0.387 | 9.49E-10 | -0.365 | 0.000346 | -0.32  | 0.000395 |
| MEOX2  | -0.487 | 1.40E-15 | -0.461 | 2.86E-06 | -0.282 | 0.002107 |
| MFAP4  | -0.597 | 5.26E-25 | -0.431 | 1.47E-05 | -0.494 | 3.34E-09 |
| MITF   | -0.343 | 8.17E-08 | -0.448 | 5.83E-06 | -0.273 | 0.00303  |
| MMRN2  | -0.465 | 3.88E-14 | -0.362 | 0.000404 | -0.247 | 0.007966 |

---



---

|          |        |          |        |          |        |          |
|----------|--------|----------|--------|----------|--------|----------|
| MN1      | -0.453 | 2.49E-13 | -0.298 | 0.004711 | -0.413 | 1.87E-06 |
| MOCS1    | -0.293 | 6.14E-06 | -0.275 | 0.009838 | -0.259 | 0.005136 |
| MORF4L1  | -0.317 | 8.19E-07 | -0.434 | 1.26E-05 | -0.33  | 0.000245 |
| MTMR6    | -0.269 | 3.71E-05 | -0.335 | 0.001209 | -0.338 | 0.00016  |
| MXRA7    | -0.241 | 0.000238 | -0.466 | 2.23E-06 | -0.383 | 1.35E-05 |
| MYCBP2   | -0.188 | 0.004761 | -0.36  | 0.000432 | -0.3   | 0.000968 |
| MYL9     | -0.3   | 3.38E-06 | -0.427 | 1.78E-05 | -0.353 | 7.31E-05 |
| N4BP2L1  | -0.472 | 1.55E-14 | -0.29  | 0.006031 | -0.297 | 0.001115 |
| NAALAD2  | -0.409 | 7.11E-11 | -0.371 | 0.000263 | -0.244 | 0.008824 |
| NAP1L3   | -0.534 | 4.08E-19 | -0.314 | 0.002647 | -0.437 | 3.46E-07 |
| NDN      | -0.491 | 6.98E-16 | -0.504 | 2.43E-07 | -0.409 | 2.46E-06 |
| NHLRC2   | -0.273 | 2.74E-05 | -0.378 | 0.000196 | -0.261 | 0.004738 |
| NID1     | -0.309 | 1.72E-06 | -0.337 | 0.001103 | -0.499 | 2.17E-09 |
| NOTCH2   | -0.316 | 8.95E-07 | -0.307 | 0.003443 | -0.366 | 3.55E-05 |
| NRP1     | -0.425 | 1.07E-11 | -0.295 | 0.005066 | -0.352 | 7.61E-05 |
| NSA2     | -0.238 | 0.000295 | -0.433 | 1.32E-05 | -0.328 | 0.000264 |
| NTRK2    | -0.353 | 3.19E-08 | -0.35  | 0.000669 | -0.277 | 0.002586 |
| NUAK1    | -0.223 | 0.000746 | -0.321 | 0.002056 | -0.504 | 1.38E-09 |
| OGN      | -0.635 | 3.96E-29 | -0.496 | 3.76E-07 | -0.518 | 3.77E-10 |
| OLFML1   | -0.493 | 5.25E-16 | -0.458 | 3.32E-06 | -0.35  | 8.81E-05 |
| OLFML3   | -0.474 | 1.15E-14 | -0.285 | 0.007205 | -0.51  | 8.30E-10 |
| OMD      | -0.575 | 9.28E-23 | -0.348 | 0.000714 | -0.454 | 9.29E-08 |
| OSBPL1A  | -0.294 | 5.69E-06 | -0.466 | 2.26E-06 | -0.323 | 0.000337 |
| PAFAH1B1 | -0.401 | 1.86E-10 | -0.404 | 5.70E-05 | -0.469 | 2.67E-08 |
| PALMD    | -0.211 | 0.001409 | -0.534 | 3.75E-08 | -0.243 | 0.008951 |
| PAMR1    | -0.33  | 2.72E-07 | -0.395 | 9.21E-05 | -0.356 | 6.03E-05 |

---

---

|         |        |          |        |          |        |          |
|---------|--------|----------|--------|----------|--------|----------|
| PARVA   | -0.417 | 2.79E-11 | -0.395 | 8.80E-05 | -0.374 | 2.20E-05 |
| PCSK5   | -0.357 | 1.98E-08 | -0.434 | 1.26E-05 | -0.438 | 3.20E-07 |
| PCYOX1  | -0.383 | 1.48E-09 | -0.465 | 2.31E-06 | -0.281 | 0.002156 |
| PDE1A   | -0.48  | 4.50E-15 | -0.325 | 0.001775 | -0.266 | 0.003891 |
| PDGFC   | -0.377 | 2.53E-09 | -0.443 | 7.75E-06 | -0.405 | 3.32E-06 |
| PDGFD   | -0.604 | 1.01E-25 | -0.473 | 1.44E-06 | -0.49  | 4.65E-09 |
| PDGFRL  | -0.48  | 3.95E-15 | -0.474 | 1.41E-06 | -0.48  | 1.14E-08 |
| PDZD2   | -0.209 | 0.001582 | -0.477 | 1.19E-06 | -0.38  | 1.60E-05 |
| PDZD8   | -0.287 | 9.53E-06 | -0.435 | 1.20E-05 | -0.449 | 1.43E-07 |
| PDZRN3  | -0.409 | 7.60E-11 | -0.444 | 7.20E-06 | -0.479 | 1.17E-08 |
| PECAM1  | -0.326 | 3.93E-07 | -0.359 | 0.000462 | -0.309 | 0.00067  |
| PELI2   | -0.47  | 1.81E-14 | -0.34  | 0.000981 | -0.344 | 0.000117 |
| PEX11A  | -0.231 | 0.000445 | -0.392 | 0.000104 | -0.344 | 0.000118 |
| PGRMC2  | -0.406 | 1.09E-10 | -0.498 | 3.38E-07 | -0.336 | 0.000176 |
| PID1    | -0.385 | 1.08E-09 | -0.494 | 4.14E-07 | -0.412 | 1.97E-06 |
| PIK3C2A | -0.29  | 7.91E-06 | -0.366 | 0.000338 | -0.293 | 0.001343 |
| PIK3R1  | -0.448 | 5.03E-13 | -0.4   | 7.02E-05 | -0.288 | 0.00166  |
| PIKFYVE | -0.225 | 0.000654 | -0.333 | 0.00128  | -0.27  | 0.003354 |
| PJA1    | -0.181 | 0.006947 | -0.48  | 9.55E-07 | -0.281 | 0.002221 |
| PJA2    | -0.573 | 1.37E-22 | -0.436 | 1.13E-05 | -0.376 | 1.97E-05 |
| PKD2    | -0.278 | 1.92E-05 | -0.455 | 3.99E-06 | -0.423 | 9.33E-07 |
| PKIG    | -0.259 | 7.50E-05 | -0.31  | 0.003014 | -0.316 | 0.000477 |
| PLAGL1  | -0.218 | 0.000946 | -0.368 | 0.00031  | -0.251 | 0.00685  |
| PLCL2   | -0.192 | 0.003867 | -0.387 | 0.000132 | -0.299 | 0.001005 |
| PLN     | -0.366 | 8.68E-09 | -0.338 | 0.001072 | -0.394 | 6.50E-06 |
| PLS3    | -0.211 | 0.001435 | -0.39  | 0.000113 | -0.417 | 1.48E-06 |

---

---

|         |        |          |        |          |        |          |
|---------|--------|----------|--------|----------|--------|----------|
| PLSCR4  | -0.549 | 1.79E-20 | -0.497 | 3.45E-07 | -0.456 | 8.33E-08 |
| PNMA1   | -0.283 | 1.27E-05 | -0.353 | 0.000587 | -0.272 | 0.003166 |
| PPP2CB  | -0.336 | 1.61E-07 | -0.382 | 0.000168 | -0.388 | 9.49E-06 |
| PPP2R5C | -0.412 | 5.03E-11 | -0.354 | 0.000564 | -0.325 | 0.000312 |
| PPP3CB  | -0.292 | 6.32E-06 | -0.481 | 9.08E-07 | -0.542 | 2.67E-11 |
| PRELP   | -0.213 | 0.001281 | -0.44  | 8.99E-06 | -0.287 | 0.001739 |
| PRKD1   | -0.249 | 0.000143 | -0.381 | 0.000174 | -0.265 | 0.00418  |
| PRNP    | -0.201 | 0.002439 | -0.332 | 0.001357 | -0.282 | 0.002147 |
| PROS1   | -0.464 | 4.88E-14 | -0.512 | 1.46E-07 | -0.432 | 4.82E-07 |
| PTEN    | -0.396 | 3.49E-10 | -0.334 | 0.001248 | -0.256 | 0.005784 |
| PTGER3  | -0.444 | 7.86E-13 | -0.5   | 3.09E-07 | -0.396 | 5.69E-06 |
| PTGER4  | -0.341 | 9.52E-08 | -0.45  | 5.39E-06 | -0.269 | 0.003529 |
| PTGFR   | -0.215 | 0.001169 | -0.293 | 0.005473 | -0.364 | 3.88E-05 |
| PTPRG   | -0.388 | 7.67E-10 | -0.307 | 0.003415 | -0.242 | 0.009299 |
| PTRF    | -0.366 | 8.67E-09 | -0.471 | 1.66E-06 | -0.499 | 2.18E-09 |
| PURA    | -0.455 | 1.69E-13 | -0.282 | 0.007776 | -0.4   | 4.60E-06 |
| QDPR    | -0.284 | 1.24E-05 | -0.302 | 0.004126 | -0.254 | 0.006167 |
| RAPGEF2 | -0.251 | 0.000124 | -0.383 | 0.000153 | -0.322 | 0.000359 |
| RASA1   | -0.3   | 3.51E-06 | -0.312 | 0.002852 | -0.356 | 6.19E-05 |
| RBM7    | -0.206 | 0.001903 | -0.457 | 3.55E-06 | -0.297 | 0.0011   |
| RCAN2   | -0.391 | 5.54E-10 | -0.452 | 4.79E-06 | -0.392 | 7.62E-06 |
| RCBTB2  | -0.356 | 2.17E-08 | -0.413 | 3.71E-05 | -0.408 | 2.72E-06 |
| RECK    | -0.519 | 5.67E-18 | -0.52  | 8.60E-08 | -0.564 | 2.56E-12 |
| RERGL   | -0.246 | 0.00018  | -0.366 | 0.000335 | -0.262 | 0.004702 |
| RGCC    | -0.282 | 1.42E-05 | -0.477 | 1.16E-06 | -0.279 | 0.002382 |
| RHOBTB1 | -0.175 | 0.008947 | -0.283 | 0.00775  | -0.27  | 0.003399 |

---

---

|          |        |          |        |          |        |          |
|----------|--------|----------|--------|----------|--------|----------|
| RNASE4   | -0.584 | 1.29E-23 | -0.514 | 1.29E-07 | -0.437 | 3.44E-07 |
| RNF11    | -0.322 | 5.33E-07 | -0.458 | 3.38E-06 | -0.343 | 0.000123 |
| ROCK1    | -0.242 | 0.000231 | -0.473 | 1.45E-06 | -0.265 | 0.004174 |
| RTN4     | -0.216 | 0.001109 | -0.356 | 0.00051  | -0.25  | 0.007113 |
| RUNX1T1  | -0.53  | 7.80E-19 | -0.428 | 1.70E-05 | -0.376 | 2.04E-05 |
| SACM1L   | -0.278 | 1.85E-05 | -0.428 | 1.76E-05 | -0.334 | 0.000201 |
| SAMD4A   | -0.248 | 0.000159 | -0.489 | 5.53E-07 | -0.411 | 2.19E-06 |
| SAR1A    | -0.178 | 0.007885 | -0.474 | 1.38E-06 | -0.337 | 0.000171 |
| SCP2     | -0.364 | 1.07E-08 | -0.433 | 1.32E-05 | -0.346 | 0.000111 |
| SEC23A   | -0.267 | 4.22E-05 | -0.499 | 3.29E-07 | -0.437 | 3.35E-07 |
| SEC24B   | -0.345 | 6.35E-08 | -0.444 | 7.41E-06 | -0.261 | 0.004787 |
| SEMA3C   | -0.346 | 6.01E-08 | -0.357 | 0.000488 | -0.336 | 0.00018  |
| SEPP1    | -0.431 | 5.00E-12 | -0.347 | 0.000758 | -0.275 | 0.002759 |
| SERINC1  | -0.478 | 5.88E-15 | -0.593 | 4.92E-10 | -0.455 | 8.81E-08 |
| SERPINF1 | -0.382 | 1.55E-09 | -0.441 | 8.79E-06 | -0.374 | 2.22E-05 |
| SERPING1 | -0.304 | 2.43E-06 | -0.352 | 0.000607 | -0.384 | 1.23E-05 |
| SFRP4    | -0.471 | 1.58E-14 | -0.329 | 0.001503 | -0.382 | 1.42E-05 |
| SGMS1    | -0.291 | 6.93E-06 | -0.386 | 0.000136 | -0.288 | 0.001622 |
| SH3BP5   | -0.27  | 3.40E-05 | -0.413 | 3.83E-05 | -0.249 | 0.007462 |
| SIRT1    | -0.251 | 0.000127 | -0.406 | 5.41E-05 | -0.253 | 0.006525 |
| SLC35G2  | -0.224 | 0.000694 | -0.377 | 0.000204 | -0.247 | 0.007999 |
| SLIT2    | -0.491 | 6.83E-16 | -0.361 | 0.000425 | -0.31  | 0.000626 |
| SLIT3    | -0.437 | 2.26E-12 | -0.337 | 0.001095 | -0.321 | 0.000371 |
| SLK      | -0.397 | 3.01E-10 | -0.305 | 0.003659 | -0.327 | 0.000278 |
| SNRK     | -0.421 | 1.75E-11 | -0.395 | 8.81E-05 | -0.345 | 0.000113 |
| SNX2     | -0.325 | 4.30E-07 | -0.509 | 1.73E-07 | -0.278 | 0.002487 |

---

---

|         |        |          |        |          |        |          |
|---------|--------|----------|--------|----------|--------|----------|
| SOCS2   | -0.383 | 1.44E-09 | -0.317 | 0.002393 | -0.312 | 0.000581 |
| SOCS5   | -0.288 | 8.61E-06 | -0.298 | 0.004595 | -0.244 | 0.008704 |
| SOS2    | -0.364 | 1.04E-08 | -0.333 | 0.001324 | -0.387 | 1.02E-05 |
| SPARC   | -0.404 | 1.42E-10 | -0.318 | 0.002295 | -0.372 | 2.49E-05 |
| SPARCL1 | -0.563 | 1.15E-21 | -0.405 | 5.58E-05 | -0.48  | 1.07E-08 |
| SPG20   | -0.36  | 1.53E-08 | -0.457 | 3.58E-06 | -0.518 | 3.69E-10 |
| SPON1   | -0.397 | 3.04E-10 | -0.422 | 2.38E-05 | -0.549 | 1.27E-11 |
| SPRY1   | -0.361 | 1.33E-08 | -0.398 | 7.65E-05 | -0.389 | 8.88E-06 |
| SPRY2   | -0.32  | 6.51E-07 | -0.413 | 3.79E-05 | -0.306 | 0.000742 |
| SPTBN1  | -0.233 | 0.000409 | -0.512 | 1.47E-07 | -0.248 | 0.007667 |
| SPTLC1  | -0.211 | 0.001464 | -0.32  | 0.002093 | -0.293 | 0.001316 |
| SRPX    | -0.388 | 8.53E-10 | -0.488 | 5.69E-07 | -0.418 | 1.40E-06 |
| SSPN    | -0.391 | 5.95E-10 | -0.489 | 5.65E-07 | -0.328 | 0.000266 |
| STARD13 | -0.518 | 7.24E-18 | -0.284 | 0.007506 | -0.384 | 1.23E-05 |
| STAT5B  | -0.322 | 5.29E-07 | -0.43  | 1.51E-05 | -0.297 | 0.001128 |
| STEAP1  | -0.261 | 6.33E-05 | -0.471 | 1.68E-06 | -0.244 | 0.008902 |
| STOM    | -0.422 | 1.55E-11 | -0.289 | 0.006361 | -0.416 | 1.54E-06 |
| STRN3   | -0.28  | 1.63E-05 | -0.372 | 0.000253 | -0.254 | 0.00629  |
| STX12   | -0.234 | 0.000385 | -0.467 | 2.12E-06 | -0.418 | 1.40E-06 |
| SUCLA2  | -0.313 | 1.15E-06 | -0.563 | 5.00E-09 | -0.304 | 0.000804 |
| SVEP1   | -0.51  | 2.87E-17 | -0.499 | 3.23E-07 | -0.444 | 2.10E-07 |
| SYNC    | -0.502 | 1.08E-16 | -0.446 | 6.46E-06 | -0.451 | 1.18E-07 |
| SYNE1   | -0.35  | 4.30E-08 | -0.28  | 0.008426 | -0.418 | 1.40E-06 |
| SYNPO   | -0.267 | 4.19E-05 | -0.462 | 2.77E-06 | -0.437 | 3.42E-07 |
| TAB2    | -0.228 | 0.000547 | -0.276 | 0.009441 | -0.271 | 0.003266 |
| TACC1   | -0.198 | 0.002839 | -0.504 | 2.46E-07 | -0.381 | 1.47E-05 |

---

---

|          |        |          |        |          |        |          |
|----------|--------|----------|--------|----------|--------|----------|
| TBC1D2B  | -0.259 | 7.61E-05 | -0.318 | 0.002318 | -0.28  | 0.002292 |
| TCF4     | -0.485 | 1.99E-15 | -0.33  | 0.001468 | -0.45  | 1.34E-07 |
| TCF7L2   | -0.259 | 7.45E-05 | -0.308 | 0.003276 | -0.4   | 4.64E-06 |
| TEK      | -0.506 | 5.69E-17 | -0.277 | 0.009331 | -0.355 | 6.31E-05 |
| TENM3    | -0.3   | 3.55E-06 | -0.421 | 2.50E-05 | -0.269 | 0.003471 |
| TGFBR2   | -0.479 | 5.07E-15 | -0.564 | 4.69E-09 | -0.44  | 2.65E-07 |
| TGFBR3   | -0.376 | 2.80E-09 | -0.39  | 0.000113 | -0.298 | 0.00105  |
| TGOLN2   | -0.373 | 4.11E-09 | -0.276 | 0.009533 | -0.371 | 2.56E-05 |
| THBD     | -0.497 | 2.94E-16 | -0.382 | 0.000168 | -0.319 | 0.000409 |
| TIMP3    | -0.429 | 5.74E-12 | -0.425 | 2.01E-05 | -0.364 | 4.02E-05 |
| TJP1     | -0.357 | 2.09E-08 | -0.367 | 0.000323 | -0.498 | 2.40E-09 |
| TLR3     | -0.313 | 1.19E-06 | -0.5   | 3.02E-07 | -0.302 | 0.000894 |
| TMEM47   | -0.337 | 1.41E-07 | -0.428 | 1.76E-05 | -0.458 | 6.71E-08 |
| TMEM59   | -0.342 | 8.92E-08 | -0.359 | 0.000453 | -0.275 | 0.002785 |
| TNS1     | -0.341 | 9.84E-08 | -0.444 | 7.32E-06 | -0.375 | 2.09E-05 |
| TNS3     | -0.218 | 0.000965 | -0.318 | 0.002264 | -0.345 | 0.000112 |
| TOR1AIP1 | -0.381 | 1.69E-09 | -0.304 | 0.003773 | -0.334 | 0.000204 |
| TRIM8    | -0.441 | 1.22E-12 | -0.343 | 0.000865 | -0.4   | 4.51E-06 |
| TSPAN31  | -0.275 | 2.43E-05 | -0.295 | 0.005098 | -0.358 | 5.46E-05 |
| TSPAN4   | -0.251 | 0.000123 | -0.336 | 0.001152 | -0.281 | 0.002206 |
| TSPYL1   | -0.452 | 2.83E-13 | -0.394 | 9.54E-05 | -0.274 | 0.002924 |
| TTC37    | -0.466 | 3.60E-14 | -0.47  | 1.75E-06 | -0.444 | 2.11E-07 |
| UBL3     | -0.494 | 4.41E-16 | -0.487 | 6.11E-07 | -0.291 | 0.001412 |
| UFSP2    | -0.324 | 4.59E-07 | -0.497 | 3.45E-07 | -0.285 | 0.00188  |
| UNC50    | -0.216 | 0.001116 | -0.319 | 0.002222 | -0.291 | 0.001456 |
| USP33    | -0.318 | 7.66E-07 | -0.424 | 2.16E-05 | -0.267 | 0.003812 |

---

---

|          |        |          |        |          |        |          |
|----------|--------|----------|--------|----------|--------|----------|
| USP8     | -0.288 | 8.67E-06 | -0.503 | 2.49E-07 | -0.302 | 0.000902 |
| VGLL3    | -0.183 | 0.006082 | -0.501 | 2.93E-07 | -0.345 | 0.000113 |
| VPS13C   | -0.376 | 3.02E-09 | -0.32  | 0.002089 | -0.406 | 2.93E-06 |
| VWA8     | -0.37  | 5.31E-09 | -0.275 | 0.009983 | -0.288 | 0.001638 |
| WDR44    | -0.307 | 2.03E-06 | -0.388 | 0.000127 | -0.241 | 0.009713 |
| WISP2    | -0.283 | 1.30E-05 | -0.425 | 2.04E-05 | -0.401 | 4.19E-06 |
| WWTR1    | -0.315 | 9.68E-07 | -0.283 | 0.007642 | -0.425 | 8.10E-07 |
| XPA      | -0.245 | 0.000184 | -0.334 | 0.001262 | -0.366 | 3.51E-05 |
| YPEL5    | -0.419 | 2.23E-11 | -0.44  | 9.19E-06 | -0.373 | 2.31E-05 |
| ZBTB38   | -0.43  | 5.39E-12 | -0.449 | 5.78E-06 | -0.244 | 0.008694 |
| ZCCHC24  | -0.576 | 7.63E-23 | -0.505 | 2.29E-07 | -0.413 | 1.91E-06 |
| ZDHHHC17 | -0.306 | 2.19E-06 | -0.344 | 0.000838 | -0.285 | 0.001882 |
| ZEB2     | -0.46  | 8.18E-14 | -0.513 | 1.34E-07 | -0.346 | 0.000105 |
| ZFP36L2  | -0.372 | 4.59E-09 | -0.338 | 0.00106  | -0.433 | 4.49E-07 |
| ZFPM2    | -0.39  | 6.38E-10 | -0.411 | 4.19E-05 | -0.401 | 4.22E-06 |
| ZNF189   | -0.257 | 8.41E-05 | -0.34  | 0.001004 | -0.28  | 0.002261 |
| ZNF423   | -0.43  | 5.66E-12 | -0.368 | 0.000302 | -0.384 | 1.26E-05 |

---
